1     **Target lipidomics reveals associations between serum sphingolipids and**  
2                     **insulin sensitivity by the glucose clamp**

3  
4  
5     **Jingya Ye<sup>1\*</sup>, Xuan Ye<sup>1\*</sup>, Wanzi Jiang<sup>1\*</sup>**, Chenyan Lu<sup>1</sup>, Xiaomei Geng<sup>1</sup>, Chenxi Zhao<sup>1</sup>, Yizhe Ma<sup>1</sup>,  
6     Panpan Yang<sup>1</sup>, Sin Man Lam<sup>2</sup>, Guanghou Shui<sup>2</sup>, Tao Yang<sup>1</sup>, John Zhong Li<sup>3</sup>, **Yingyun Gong<sup>1#</sup>**,  
7     **Zhenzhen Fu<sup>1#</sup>, Hongwen Zhou<sup>1#</sup>**

8  
9     \* Jingya Ye, Xuan Ye, and Wanzi Jiang contributed equally to this work

10  
11    # Yingyun Gong, Zhenzhen Fu and Hongwen Zhou are the co-corresponding authors.

12  
13    **AFFILIATION:**

14    1 Department of Endocrinology, The First Affiliated Hospital of Nanjing Medical University (Jiangsu  
15    Province Hospital), Nanjing, Jiangsu, China

16    2 Institute of Genetics and Developmental Biology, Chinese Academy of Sciences, Beijing, China

17    3 Department of Biochemistry and Molecular Biology, Nanjing Medical University, Nanjing, Jiangsu,  
18    China

19  
20    **Correspondence**

21    Corresponding author: Hongwen Zhou

22    Department of Endocrinology, the First Affiliated Hospital of Nanjing Medical University, 300

23    Guangzhou Road, Nanjing, China, 210029

24    E-mail drhongwenzhou@njmu.edu.cn

25    Tel: 011-86-25-83718836-6983

26    Fax: 011-86-25-83781781

27    Corresponding author: Yingyun Gong

28 Department of Endocrinology, the First Affiliated Hospital of Nanjing Medical University, 300

29 Guangzhou Road, Nanjing, China, 210029

30 E-mail [gongyingyun@126.com](mailto:gongyingyun@126.com)

31 Tel: 011-86-25-83718836-6983

32 Fax: 011-86-25-83781781

33 Corresponding author: Zhenzhen Fu

34 Department of Endocrinology, the First Affiliated Hospital of Nanjing Medical University, 300

35 Guangzhou Road, Nanjing, China, 210029

36 E-mail [zhenzhen1127@foxmail.com](mailto:zhenzhen1127@foxmail.com)

37 Tel: 011-86-25-83718836-6983

38 Fax: 011-86-25-83781781

39

40

41

42

43

44

45

46

47

48

49

50

51

52

53

54

55

56 **Abstract**

57

58 **Background**

59 This study aimed to systematically investigate the associations between serum sphingolipids and insulin  
60 sensitivity as well as insulin secretion. This study also aimed to reveal potential predictors for insulin  
61 sensitivity or give perceptive insight into disease processes.

62 **Methods**

63 We conducted a lipidomics evaluation of molecularly distinct SPs in the serum of 86 consecutive  
64 Chinese adults with or without obesity and diabetes using electrospray ionization mass spectrometry  
65 coupled with liquid chromatography. The GIR30 was measured under steady conditions to assess  
66 insulin sensitivity by the gold standard hyperinsulinemic-euglycemic clamp. We created the ROC  
67 curves to detect the serum SMs diagnostic value and establish the diagnosis of insulin sensitivity.

68 **Results**

69 Differential correlation network analysis illustrated correlations amongst lipids, insulin sensitivity,  
70 insulin secretion and other clinical indexes. Total and subspecies of serum SMs and  
71 globotriaosylceramides (Gb3s) were positively related to GIR30, free FAs (FFA 16:1, FFA20:4), some  
72 long chain GM3 and complex ceramide GluCers showed strong negative correlations with GIR30.  
73 Notably, ROC curves showed that SM/Cer and SM d18:0/26:0 may be good serum lipid predictors of  
74 diagnostic indicators of insulin sensitivity close to conventional clinical indexes such as 1/HOMA-IR  
75 (all areas under the curve >0.80) based on GIR30 as standard diagnostic criteria.

76 **Conclusions**

77 These results provide novel associations between serum sphingolipid between insulin sensitivity  
78 measured by the hyperinsulinemic-euglycemic clamp. We further identify two specific SPs that may  
79 represent prognostic biomarkers for insulin sensitivity.

80

81

82 **Key Words:** lipidomics, sphingolipids, insulin sensitivity, clamp, insulin secretion

83

## 84 **Background**

85 SPs, including SMs, GM3s, ceramides, and gangliosides, are a group of ubiquitously produced lipids  
86 that play crucial roles in cell membrane function and cell signaling pathways(1). Sphingolipids and  
87 their substrates and constituents, FAs, have been implicated in the pathogenesis of various metabolic  
88 diseases associated with decreased insulin sensitivity/IR, obesity, diabetes, and atherosclerosis(2,3).  
89 When  $\beta$  cells of obese and IR individuals fail to secrete enough insulin to compensate for decreased  
90 insulin sensitivity, hyperglycemia develops(4). It is likely that perturbations in serum SPs and FAs are  
91 associated with diseases. Identifying these associations may reveal useful predictors or give perceptive  
92 insight into disease processes. For instance, decreased circulating saturated FAs through food intake, a  
93 kind of harmful FAs, could improve mouse insulin sensitivity(5). Cell membrane GM3s were found to  
94 display opposite associations with insulin resistance depending on acyl chain compositions(6). Based  
95 on a study of 2302 Singapore Chinese population, two specific SPs might represent prognostic  
96 biomarkers for T2DM (7). Another study found that SMs C14:0, C22:3, and C24:4 were positively  
97 associated with insulin secretion and glucose tolerance(8). However, due to the complexity and  
98 diversity of lipids, and differences in the analytical approaches adopted for sphingolipid measurements,  
99 the precise associations of sphingolipids with clinical indices of insulin sensitivity and secretion remain  
100 unclear. Fortunately, given the fundamentally development of LC-MS, the overall classification of lipid  
101 species in biological processes and has been improved in recent years. Such advances have expanded  
102 the collection of the “sphingolipidome” to more than 600 structurally distinct SPs and potentially  
103 thousands of theoretical metabolites that are likely to exist(9). In our study, we used a profile with more  
104 comprehensive coverage of different SP subclasses to recover their novel correlations with insulin  
105 sensitivity.

106  
107 Commonly used clinical indexes for the evaluation of insulin sensitivity/resistance, such as the HOMA-  
108 IR, Matsuda index and QUICKI, are derived from circulating glucose and insulin levels, which are  
109 simple and noninvasive but indirect and subject to fluctuation (10). The gold standard for assessing  
110 insulin sensitivity is the hyperinsulinemic-euglycemic clamp developed by the DeFronzo group in the  
111 1970s (11). This approach assesses insulin-mediated glucose utilization under steady-state conditions,

112 which is both laborious and time-consuming as well as limited for large-scale use. However, the  
113 advantages of the glucose clamp are obvious for measuring insulin sensitivity/resistance directly and  
114 straightforwardly and further distinguishing hepatic and peripheral insulin sensitivity/resistance  
115 simultaneously when radiolabeled glucose tracers are used. To date, the glucose clamp has been applied  
116 as a standard assessment for other clinical indexes in various cross-sectional studies and prospective  
117 investigations to test the effect of different interventions on insulin sensitivity (12-14). Moreover, the  
118 IVGTT is an alternative method recommended to test insulin secretion and evaluate pancreatic islet  
119 function. It is acknowledged that a reduction in FPIR is the earliest detectable defect in  $\beta$ -cell function  
120 in individuals predisposed to develop T2DM and that this defect largely indicates  $\beta$ -cell exhaustion  
121 after years of compensation for antecedent IR (15).

122  
123 SP metabolism is dysregulated in metabolic diseases and any of these specific lipid molecules may  
124 represent a potential biomarker of insulin resistance or other metabolic diseases. To date, there have  
125 been few systematic evaluations of the correlations between individual serum SP species with insulin  
126 sensitivity assessed by the hyperinsulinemic-euglycemic clamp. In this study, we investigated the  
127 associations of various serum SPs and FAs quantitated using a targeted lipidomic approach with insulin  
128 sensitivity and insulin secretion(Figure 1). We aimed to 1) investigate the incipient SPs and FAs patterns  
129 related to insulin sensitivity and insulin secretion, 2) identify predictive and diagnostic serum lipid  
130 indicators related to insulin sensitivity or islet function, thus preventing elevated risks of related  
131 symptoms and associated treatment expenditures, and. 3) explore and discuss potential lipid metabolic  
132 pathways associated with insulin sensitivity or islet function.

133

134

## 135 **Materials and Methods**

136 **Study participants.** Briefly, 86 participants aged from 18 to 60 years (number of Female:46) were  
137 enrolled in this project in Nanjing, Jiangsu Province, China. To broadly detect the range of insulin  
138 sensitivity, participants were normal weight (n=25), overweight(n=9;  $24 \text{ kg/m}^2 \leq \text{BMI} < 30 \text{ kg/m}^2$ ) or  
139 obese(n=52( $\text{BMI} > 30 \text{ kg/m}^2$ )), and with or without diabetes(number of participants with diabetes:25).

140 Exclusion criteria included use of medication or supplements, smoking or high alcohol use (>4 and >2  
141 standard drinks/week for men and women, respectively), other major diseases or presence of acute  
142 inflammation or pregnancy(Figure 2).

143

144 **Hyperinsulinemic-euglycemic clamp.** The hyperinsulinemic-euglycemic clamp presumes that the  
145 hyperinsulinemic state induced by a high dose of insulin infusion ( $>80 \text{ mU/m}^2 \cdot \text{min}$ ) is sufficient to  
146 totally suppress hepatic glucose production and that there is no net change in the circulating blood  
147 glucose concentration under steady conditions(Supplementary Figure 1). Therefore, the GIR is  
148 equivalent to that of whole-body GDR or M value, which represents body insulin sensitivity(11). After  
149 an overnight fast, subjects were studied the next morning in the supine position. A prepared dose of  
150 insulin ( $80 \text{ mU/m}^2$ ) was injected over the next 10 minutes to achieve a steady-state insulin concentration.  
151 The clamp duration was at least 2h. A variable infusion of 20% glucose was started to maintain the  
152 plasma glucose concentration at 5 mmol/L (4.5-5.5 mmol/L).  $\text{GIR}_{30}$  was calculated from the mean  
153 glucose infusion rate during the last 30 minutes (14).

154

155 **IVGTT.** Briefly, 0.3 g/kg body weight of a 20% glucose solution was given within 3 minutes. The  
156 FPIR is defined as the initial burst of insulin, which is released within the first 10 minutes and peaks at  
157 2-4 minutes after glucose injection. After the acute response, there is a second-phase insulin secretion,  
158 which rises more gradually (16). Blood samples for the measurement of plasma glucose and serum  
159 insulin were collected at 0, 2, 4, 6, 8, 10, 20, 30, and 60 minutes. The FPIR was calculated as the mean  
160 of the 2- to 4-minute samples minus the mean pre-stimulus hormone concentration (0 minutes) (17).

161

162 **Laboratory measurements.** Blood glucose was analyzed by a blood glucose biochemical analyzer  
163 (Germany, Biosen). Serum insulin and C-peptide were measured by chemiluminescent methods.  
164 HbA1c was analyzed by a chromatographic technique, and TC, TG, LDL-c, HDL-c and other  
165 biochemical phenotypes were measured with standard enzymatic assays in the laboratory of the First  
166 Affiliated Hospital of Nanjing Medical University, Nanjing, China.

167

168 **Targeted lipidomics analysis.** Lipids were extracted from serum (20  $\mu$ L) using a modified Bligh and  
169 Dyer's extraction procedure (double rounds of extraction) and dried in a SpeedVac under OH mode.  
170 Prior to analysis, lipid extracts were resuspended in chloroform:methanol 1:1 (v/v) spiked with  
171 appropriate internal standards. All lipidomic analyses were carried out on an Exion UPLC system  
172 coupled with a QTRAP 6500 PLUS system (Sciex) as described previously(18). Sphingolipids were  
173 separated on a Phenomenex Luna Silica 3  $\mu$ m column (i.d. 150x2.0 mm) under the following  
174 chromatographic conditions: mobile phase A (chloroform:methanol:ammonium hydroxide, 89.5:10:0.5)  
175 and mobile phase B (chloroform:methanol: ammonium hydroxide: water, 55:39:0.5:5.5) at a flow rate  
176 of 270  $\mu$ L/min and column oven temperature at 25  $^{\circ}$ C. Individual sphingolipid species were quantified  
177 by reference to spiked internal standards including Cer d18:1/17:0, GluCer d18:1/8:0, LacCer d18:1/8:0,  
178 and SM d18:1/12:0, obtained from Avanti Polar Lipids; d<sub>3</sub>-GM<sub>3</sub> d18:1/18:0 and Gb<sub>3</sub> d18:1/17:0  
179 purchased from Matreya LLC; d<sub>8</sub>-FFA 20:4 from Cayman Chemicals; and d<sub>31</sub>-FFA16:0 from Sigma-  
180 Aldrich.

181  
182 **Statistical analysis.** Lipids were divided into groups and analyzed based on carbon atom and double  
183 bond numbers. The typical cutoff value of GIR<sub>30</sub> (or GDR, M value) of 4.9-5.2 mg/kg per minute was  
184 used to define insulin sensitive or resistant subjects(14,19). In our study, the cutoff point of GIR<sub>30</sub> was  
185 set as 5.1 mg/(kg \*min), which was also the median of consecutive 86 subjects. Differences in metabolic  
186 characteristics between two groups divided by GIR<sub>30</sub> were calculated by t-test or the Mann-Whitney U  
187 test. Analyses were performed using SPSS for Macintosh version 25.0 (SPSS Inc, Chicago, IL, USA).  
188 Associations between metabolic parameters and lipid species were analyzed by Pearson correlation  
189 based on univariate logistic regression and adjusted for multiple factors, including age, sex, BMI, HDL-  
190 c, LDL-c, TG, TC, ALT and AST. Gephi was used to build correlation networks from differentially  
191 correlated lipid pairs. Data are presented as the mean  $\pm$  SD or median (range). P<0.05 was considered  
192 statistically significant.

193

194 **Results**

195 **Participants' characteristics.** Table 1 shows the characteristics of the 86 subjects in our study.  
196 According to the glucose clamp results, all the participants were divided into insulin-resistant and  
197 insulin-sensitive groups by GIR<sub>30</sub>, which was defined as 5.1 mg/(kg \*min) (Table 1). We also applied  
198 IVGTT to evaluate islet function, and all individuals were separated into high insulin secretion and low  
199 insulin secretion groups by FPIR (Table 2). Subjects who presented insulin sensitivity were similar in  
200 age and sex to IR individuals but had lower levels of serum fasting glucose and 2h-OGTT glucose,  
201 neutral lipids including TC, TG, HDL-c, and LDL-c and liver enzymes including ALT and AST. Those  
202 who showed lower FPIR had comparable age, BMI and neutral lipids but higher levels of serum fasting  
203 glucose and 2h-OGTT glucose than those with high FPIR.

204  
205 **Serum lipids and basic clinical characteristics** A. total of 90 lipid species in 7 classes of lipids,  
206 including FFAs, SMs, ceramides, GluCers, LacCers, GM3s and Gb3s, were quantitated and analyzed  
207 in the 86 human serum samples. We first evaluated differences among lipids with age and gender. There  
208 was a tendency of increased SMs and significant enhancements in GluCer d18:0/18:0 and Gb3  
209 d18:1/20:0 (P<0.05) and decreases in GM3 d18:1/18:0, GM3 d18:0/18:0, and GM3 d18:1/20:0 (P<0.05)  
210 in females compared with males (P<0.05); however, no differences were found in the total or subtypes  
211 of serum ceramides (Supplementary Table 1). The lipid classes that extensively increased with age were  
212 FFAs, ceramides and GM3 (P<0.05), and those that tended to drop were SMs, GluCer and LacCer  
213 (Supplementary Table 2). Similarly, in individuals with high BMI values, the perceivably increased  
214 lipids were FFAs, ceramides and GM3s, while lipids such as SMs, GluCers and LacCers declined  
215 (Supplementary Table 3).

216  
217 **Differential analysis and correlation network of GIR and FPIR.** We used a heatmap to visualize the  
218 trends of lipidomics among the 86 individuals divided by GIR<sub>30</sub> (Figure 3, Supplementary Table 4). The  
219 results showed a significant higher in total serum SMs in the high GIR<sub>30</sub> (insulin sensitive) group  
220 (P<0.05) and a mild tendency of serum GluCers, LacCers and Gb3s, especially GluCer d18:1/20:0 and  
221 Gb3 d18:1/24:0, to increase. However, in the high GIR<sub>30</sub> group, a decrease was also seen in some FFAs,  
222 ceramides and GM3s (Figure 3), especially C18 FFAs (FFA 18:3, FFA 18:1, FFA 18:0) and FFA16:1,



223 long-chain unsaturated ceramides (Cer d18:1/22:0, Cer d18:1/24:0, Cer d18:1/24:1) and most saturated  
224 GM3s (GM3 d18:0/16:0, GM3 d18:1/18:0, GM3 d18:0/18:0, GM3 d18:1/20:0, GM3 d18:0/20:0, GM3  
225 d18:1/22:0, GM3 d18:0/22:0, GM3 d18:0/24:0). Interestingly, most serum lipids increased in  
226 individuals with low insulin secretion, including FFAs (FFA 22:6, FFA 22:5, FFA 18:2, FFA 18:1, FFA  
227 18:0, FFA 16:0), Lac-Cers (LacCer d18:1/16:0, LacCer d18:1/18:0, LacCer d18:1/20:0, LacCer  
228 d18:1/22:0, LacCer d18:1/24:0, LacCer d18:1/24:1), ceramide (Cer d18:1/22:0, Cer d18:1/24:0, Cer  
229 d18:1/24:1), and GM3 (GM3 d18:0/16:0, GM3 d18:1/18:0, GM3 d18:0/20:0, GM3 d18:0/24:0, GM3  
230 d18:1/22:0, GM3 d18:0/22:0, GM3 d18:1/24:0, GM3 d18:0/24:0) (Supplementary Table 5). These  
231 findings might be because of lipid toxicity.

232 A correlation network was constructed to systematically evaluate the correlation of the clinical indexes  
233 and lipidomics, as well as lipid-related interrelationships. We raised our correlation coefficient limit to  
234 0.2 ( $p < 0.05$ ), and the results indicated that the lipids that were positively related to GIR<sub>30</sub> including  
235 GluCers (GluCer d18:1/20:0, GluCer d18:1/22:0, GluCer d18:0/24:0, GluCer d18:0/24:1), Gb3s (GB3  
236 d18:1/24:0, GB3 d18:1/16:0) and all SMs (SM d18:1/19:1, SM d18:1/23:1, SM d18:1/25:1, SM  
237 d18:1/25:0, SM d18:0/25:0, SM d18:1/26:1, SM d18:1/26:1, SM d18:0/26:0, and so on), while FFAs  
238 (FFA16:1, FFA20:4) and GM3 (GM3 d18:1/18:0, GM3 d18:0/18:0, GM3 d18:1/20:0, GM3 d18:0/20:0)  
239 were negatively correlated with GIR<sub>30</sub>. This relationship still existed when adjusted for age, sex, BMI,  
240 TG, TC, HDL-c, LDL-c, ALT and AST (Figure 4 Supplementary Table 6). Serum lipids showed a  
241 negative relationship with FPIR, including FFAs (FFA22:5, FFA18:2, FFA18:1, FFA16:0), GluCers  
242 (GluCer d18:1/16:0, GluCer d18:1/18:0, GluCer d18:1/20:0), LacCer (LacCer d18:1/20:0, LacCer  
243 d18:1/24:0, LacCer d18:1/24:1), which still existed after adjustment for age, sex and BMI (Figure 4,  
244 Supplementary Table 6). Notably, HDL is a lipid protein known to transport SMs. Our data showed  
245 that HDL-c, not LDL-c, was correlated positively with most SMs.

246  
247 **Use of the ROC test for the diagnosis of insulin sensitivity.** To discover serum lipid predictive and  
248 prognostic biomarkers for insulin sensitivity evaluation, we assessed the predictive value of various  
249 lipids by ROC curve analysis using GIR as a standard criterion (Figure 5, Supplementary Table 7).  
250 Notably, the ratio of total serum SMs and ceramides (SM/Cer) showed high diagnostic efficiency, as it

251 was equal to 1/HOMA-IR, with 0.85 (0.77-0.94) and 0.85 (0.77-0.93), respectively. Moreover, SM  
252 18:0/26:0, a subspecies of SMs, showed close and high diagnostic efficiency with 0.84 (0.75-0.93),  
253 while other lipids showed lower diagnostic efficiency, such as total serum ceramides 0.35 (0.23-0.46)  
254 and FFAs 0.38 (0.26-0.5).

255

## 256 **Discussion**

257 In the current work, we report the systematic analysis of the sphingolipidome, allowing for an accurate  
258 evaluation of the associations between serum SPs content and obesity and diabetes related  
259 characteristics, such as insulin sensitivity, BMI, blood lipids, and HOMA-IR. We also found that higher  
260 concentration of serum free FAs(FFA 22:6, FFA 22:5, FFA 18:2, FFA 18:1), substrates and constituents  
261 of SPs, were associated with a higher risk of decreased insulin secretion. Of note, ROC curves showed  
262 that SM/Cer and SM d18:0/26:0 may be good serum lipid predictors of diagnostic indicators for insulin  
263 sensitivity close to conventional clinical indexes such as 1/HOMA-IR (all areas under the curve >0.80)  
264 based on GIR<sub>30</sub> as standard diagnostic criteria.

265

266 We conducted a lipidomics evaluation of molecularly distinct SPs in the serum of 86 consecutive  
267 Chinese adults with or without obesity and diabetes using electrospray ionization mass spectrometry  
268 coupled with liquid chromatography. Our study involved a thorough evaluation of lipid profile changes  
269 in human serum samples among 90 lipid species. These lipids are from 7 subclasses, including FFAs  
270 (15 species), SMs (27 species), ceramides (8 species), GluCers (12 species), LacCers (8 species), GM3s  
271 (14 species) and Gb3s (6 species). We found an increasing tendency in complex serum sphingolipids  
272 (SPs), including SMs and GluCers, in females, which is consistent with recent large-scale lipidomic  
273 investigations of Chinese T2DM patients in Singapore (7). The possible reason for sex differences  
274 might be sex hormone estrogens, which could improve sphingolipid synthesis and reduce sphingolipid  
275 degradation by attenuating acid sphingomyelinase activities (20,21). We also observed that serum FFAs,  
276 ceramides and GM3 were significantly higher in individuals of older age or with a higher BMI, which  
277 might be due to the exacerbation of lipid-related inflammatory factors with age or BMI (7,22-24).

278 Interestingly, our results showed that SMs showed no significant changes with age or BMI, indicating  
279 that SMs were less likely to be age- or BMI-related proinflammatory mediators.

280

281 The glucose infusion rate over 30 minutes ( $GIR_{30}$ ) under steady conditions to assess insulin sensitivity  
282 by the gold standard hyperinsulinemic-euglycemic clamp, and first-phase insulin release (FPIR) to  
283 evaluate insulin secretion by the intravenous glucose tolerance test (IVGTT).

284 In comparison to previous studies (7,25,26), we further identified more lipid species related to obesity  
285 and T2DM. In general, serum FFAs, ceramides and GM3s were decreased in subjects with high  $GIR_{30}$ ;  
286 however, serum SMs, GluCers, LacCers and Gb3s were increased in individuals with high  $GIR_{30}$ .

287 Remarkably, all species of serum SMs analyzed were relevant to increased insulin sensitivity, while  
288 partial species of serum ceramides (Cer d18:1/22:0, Cer d18:1/24:0, Cer d18:1/24:1) were corroborated  
289 with a higher risk of impaired insulin sensitivity. In mammals, substrate specificity is distinguished

290 by CerS with N-acyl chain length. CerS has six isoforms (CerS1-6), and CerS2 seems to be a unique  
291 enzyme with a higher activity for very long-chain fatty acids such as C22-C26. Our findings showed  
292 that these very long-chain ceramides (Cer d18:1/22:0, Cer d18:1/24:0, Cer d18:1/24:1) were increased

293 in IR individuals, consistent with part of a previous study indicating that ceramides with larger carbon  
294 atom numbers and more unsaturated bonds were more strongly associated with an increased risk of  
295 diabetes (7). These findings suggested that compositional variations in specific species of ceramides

296 were associated with risks of IR or diabetes, even though the number of total ceramides remained  
297 unchanged. We also found a positive correlation between serum GluCers and  $GIR_{30}$ , and the paradox  
298 of correlations indicated that more complex ceramides are different from ceramide regulation. Cross-

299 sectional studies about serum SMs and insulin sensitivity in humans are limited. Among these studies,  
300 the associations between SMs and HOMA-IR are still controversial (25,27-29). This discrepancy may  
301 be attributed to a number of factors: 1) ethnic characteristics, 2) effective population size, 3) age span

302 changes from young adults to elderly individuals, 4) accuracy of clinical indicators such as HOMA-IR,  
303 Matsuda index or QUICKI, 5) different lipidomics analytical platforms, 6) combined influence of body  
304 weight, 7) onset of diabetes time course, 8) drug intervention for diabetes, and 9) accompaniment by

305 other metabolic diseases. Interestingly, our results were notable: all species of SMs showed a strong

306 positive relationship with GIR<sub>30</sub>, and only some ceramides were negatively related to GIR<sub>30</sub>. The  
307 characteristics of the study were as follows: 1) young and middle-aged adults between 18 and 56  
308 (median 26.5), 2) body weight ranging from normal weight to overweight to obese, 3) obese subjects  
309 with or without newly diagnosed diabetes, 4) a thorough evaluation of SPs specific for 27 species of  
310 SMs and 8 species of ceramides through targeted lipidomics measurements, and 5) insulin sensitivity  
311 evaluated by the gold standard, glucose clamp evaluation.

312

313 We created the ROC curves to detect the serum SMs diagnostic value and establish the diagnosis of  
314 insulin sensitivity based on GIR<sub>30</sub> derived from the glucose clamp, which is the standard method, and  
315 the cutoff point of GIR<sub>30</sub> was set as 5.1 mg/(kg \*min). ROC analysis provides tools to screen possibly  
316 optimal models in a direct and natural way of diagnostic decision making. It is a comparison of two  
317 operating characteristics as the criterion changes. In the current study, we found that serum very long-  
318 chain SM d18:0/26:0 and the ratio of total serum SMs and Cers (SM/Cer) could be good predictors of  
319 insulin sensitivity that were very close to 1/HOMA-IR. Although SM d18:0/26:0 accounted for the  
320 lowest portion of total serum SMs, it seems to be a much more sensitive indicator of insulin sensitivity.  
321 Ceramides are substrates that generate SMs and are intermediate lipid links in sphingolipid metabolism.  
322 We used SM/Cer as a novel index that reflects the direction of sphingolipid reactions. As the ratio  
323 increases, more SMs are produced in the forward direction. We aimed to discover the pathological  
324 relevance of our identified lipids with regard to insulin sensitivity. Because sphingolipid synthesis and  
325 catabolism are dysregulated in metabolic diseases, any of these specific molecules may reflect a  
326 potential biomarker of decreased insulin sensitivity or other pathologies (30). A study also revealed that  
327 a metabolite panel appreciably improved T2DM risk prediction over or close to conventional clinical  
328 factors (18,31). The serum lipid parameters we identified could be good predictors compared with  
329 HOMA-IR, where GIR<sub>30</sub> was used as a standard reference. These predictors we screened emphasized  
330 that the scarce and uncommon lipids might be useful for further insulin sensitivity mechanism  
331 exploration as well as clinical diagnosis and prevention.

332

333 We did not find specific lipid indicators of insulin secretion by ROC analysis. However, our correlation  
334 network analysis data showed a negative association between serum total FFAs and FPIR, and it  
335 disappeared after adjustment for age, sex, BMI, TC, TG, HDL-c, LDL-c, ALT and AST. More  
336 interestingly, 18-chain FFAs and 22-chain FFAs remained negatively correlated with FPIR when  
337 adjusted for the above factors, which indicated a strong relationship between these subtypes of FFAs  
338 and FPIR. A previous study based on the OGTT observed an association between higher total fasting  
339 plasma FFA levels and lower insulin secretion in children and adults without adjustments for  
340 confounding factors (32). Some studies proved that chronic FFA-induced lipotoxicity on pancreatic  
341 islets contributed to  $\beta$  cell dysfunction (33,34). Therefore, a reduction in elevated plasma FFA levels  
342 might be a critical therapeutic target for obesity-related type 2 diabetes. Although some studies showed  
343 that 24-72 h fatty acid stimulation increased insulin secretion in isolated islets from nondiabetic mice  
344 or humans (35,36), there were two different notable effects of short-term and long-term FFA stimuli on  
345 insulin secretion, and  $\beta$  cell function was impaired by long-term FFA stimulation. We considered that  
346 the negative association between these subtypes of serum FFAs, including 18-chain and 22-chain FFAs  
347 and FPIR in our study population, represented long-term damage to insulin secretion.

348  
349 The major strengths of our current study are as follows. First, our targeted lipidomics approach  
350 permitted the unambiguous identification and accurate quantitation of serum lipids. This procedure  
351 unveiled unambiguous identification and accurate quantitation of serum lipids and evaluated systematic  
352 lipid pathway coregulation via multiple correlation analyses. Second, in terms of the study cohorts, we  
353 screened serum lipid predictors for the diagnosis of insulin sensitivity in Chinese individuals including  
354 normal-weight, overweight, obese and diabetic subjects, which is the gold standard for evaluating  
355 insulin sensitivity clinically. Third, we found that serum very long-chain SM (d18:0/26:0) and the  
356 SM/Cer could be good predictors for insulin sensitivity, which was very close to 1/HOMA-IR and of  
357 great value for diagnosis and prevention. However, there were also some limitations. First, lifestyle  
358 habits, including diet and exercise, were not controlled in the current study due to the lack of formal  
359 questionnaire or recording. These habits may also influence the analysis of lipids, since some  
360 sphingolipid species were shown to increase in HFD-induced obese mice (37,38). Second, laborious

361 and time-consuming glucose clamps limited our cross-sectional study from being performed on a large  
362 scale, and further work is required to verify our findings. Third, it might influence the serum  
363 sphingolipid patterns that IR patients in our study had higher BMI than those of insulin sensitivity ,  
364 since we corrected these effects through statistics methods.

365

## 366 **Conclusion**

367 In summary, these results provide novel associations between serum sphingolipid levels and insulin  
368 sensitivity measured by hyperinsulinemic-euglycemic clamp. This finding suggests that the balance of  
369 SMs metabolism, rather than ceramide, is correlated with the pathology of insulin resistance, obesity  
370 and T2DM. We further identified two specific SPs that may represent prognostic biomarkers for insulin  
371 sensitivity.

372

373

374

375

376

377

378

379

## 380 **Abbreviations**

381 SP: sphingolipid; SM: sphingomyelin; GM3, sphingosine; FAs, fatty acids; GluCers: Glu-ceramides;  
382 LacCers: Lac-ceramides; GIR<sub>30</sub>: glucose infusion rate over 30 minutes; FPIR, first-phase insulin release;  
383 IVGTT: intravenous glucose tolerance test; ROC: receiver operating characteristic; IR, insulin  
384 resistance; LC-MS, liquid chromatography-mass spectrometry; QUICKI: quantitative insulin  
385 sensitivity check index; GDR, glucose disposal; M: metabolizable glucose; TC: total cholesterol; TG:  
386 triglyceride; LDL-c: LDL-cholesterol; HDL-c: HDL-cholesterol; ALT: alanine transaminase; AST:  
387 aspartate transaminase; Gb3: globotriaosylceramides; CerS: ceramide synthase; SM/Cer: ratio of total  
388 serum SMs and Cers.

389

390 **Ethics approval and consent to participate**

391 This study protocol was approved by the Institutional Review Board of the First Affiliated Hospital of  
392 Nanjing Medical University, and all participants provided written informed consent (2014-SR-003). All  
393 participants provided written informed consent prior to study entry.

394

395 **Consent for publication**

396 All authors have participated in the work and have reviewed and agree with the content of the article.

397

398 **Availability of data and materials**

399 We do not have governance permissions to share individual level data on which these analyses were  
400 conducted since they derive from clinical record data. However, for any bona fide requests to audit the  
401 validity of the analyses, the verifiable research pipeline which we operate means that one can request  
402 to view the analyses being run and the same tabulations resulting. We are also happy to share summary  
403 statistics for those wishing to conduct meta-analyses with other studies.

404

405 **Competing interests**

406 The authors declared that there is no conflict of interest associated with this article.

407

408 **Funding**

409 This study was supported by the National Key R&D Program of China [2018YFA0506904], the  
410 National Natural Science Foundation of China [91854122, 81670723, 31900832], revitalize and defend  
411 the key talent's subsidy project in science and education of department of public health of Jiangsu  
412 Province [ZDRCA2016017] and Jiangsu Science and Technology Office [BK20191074].

413

414 **Authors' contributions**

415 The authors thank the staff and participants for their important contributions. Jingya Ye, Xuan Ye and  
416 Wanzi Jiang were responsible for data collection, analysis and writing of the first draft of manuscript.  
417 Zhenzhen Fu and Yingyun Gong contributed to the human glucose clamp study performance and  
418 guidance of clinical data acquisition. Jingya Ye, Xuan Ye, Wanzi Jiang, Xiaomei Geng, Chenxi Zhao,

419 Chenyan Lu, Yizhe Ma, and Panpan Yang took part in human glucose clamp performance. Sin Man  
420 Lam and Guanghou Shui contributed to lipidomic measurement. John Zhong Li, Feng Chen and Tao  
421 Yang contributed to data analysis and statistic process. Hongwen Zhou was the guarantors of this work  
422 and, as such, had full access to all of the data in the study and take responsibility for the integrity of the  
423 data and the accuracy of the data analysis.

424

425 **Acknowledgements** The authors acknowledge all the physicians and nurses taking part in the  
426 enrolment of participants in the First Affiliated Hospital of Nanjing Medical University.

427

428

429

430

431

432

433

434

435

436

437

438

439

440

441

442

443

444

445

446



447 **Reference**

- 448 1. Hammerschmidt P, Ostkotte D, Nolte H, Gerl MJ, Jais A, Brunner HL, Sprenger HG, Awazawa  
449 M, Nicholls HT, Turpin-Nolan SM, Langer T, Kruger M, Brugger B, Bruning JC. CerS6-  
450 Derived Sphingolipids Interact with Mff and Promote Mitochondrial Fragmentation in Obesity.  
451 *Cell*. 2019;177(6):1536-1552 e1523.
- 452 2. Summers SA. Sphingolipids and insulin resistance: the five Ws. *Curr Opin Lipidol*.  
453 2010;21(2):128-135.
- 454 3. Kahn SE, Hull RL, Utzschneider KM. Mechanisms linking obesity to insulin resistance and  
455 type 2 diabetes. *Nature*. 2006;444(7121):840-846.
- 456 4. Kahn SE. Clinical review 135: The importance of beta-cell failure in the development and  
457 progression of type 2 diabetes. *J Clin Endocrinol Metab*. 2001;86(9):4047-4058.
- 458 5. Finucane OM, Lyons CL, Murphy AM, Reynolds CM, Klinger R, Healy NP, Cooke AA, Coll  
459 RC, McAllan L, Nilaweera KN, O'Reilly ME, Tierney AC, Morine MJ, Alcalá-Díaz JF, Lopez-  
460 Miranda J, O'Connor DP, O'Neill LA, McGillicuddy FC, Roche HM. Monounsaturated fatty  
461 acid-enriched high-fat diets impede adipose NLRP3 inflammasome-mediated IL-1beta  
462 secretion and insulin resistance despite obesity. *Diabetes*. 2015;64(6):2116-2128.
- 463 6. Kabayama K, Sato T, Saito K, Loberto N, Prinetti A, Sonnino S, Kinjo M, Igarashi Y, Inokuchi  
464 J. Dissociation of the insulin receptor and caveolin-1 complex by ganglioside GM3 in the state  
465 of insulin resistance. *Proc Natl Acad Sci U S A*. 2007;104(34):13678-13683.
- 466 7. Chew WS, Torta F, Ji S, Choi H, Begum H, Sim X, Khoo CM, Khoo EYH, Ong WY, Van Dam  
467 RM, Wenk MR, Tai ES, Herr DR. Large-scale lipidomics identifies associations between  
468 plasma sphingolipids and T2DM incidence. *JCI Insight*. 2019;5.
- 469 8. Bergman BC, Brozinick JT, Strauss A, Bacon S, Kerege A, Bui HH, Sanders P, Siddall P, Kuo  
470 MS, Perreault L. Serum sphingolipids: relationships to insulin sensitivity and changes with  
471 exercise in humans. *Am J Physiol Endocrinol Metab*. 2015;309(4):E398-408.
- 472 9. Lai MK, Chew WS, Torta F, Rao A, Harris GL, Chun J, Herr DR. Biological Effects of  
473 Naturally Occurring Sphingolipids, Uncommon Variants, and Their Analogs. *Neuromolecular*  
474 *Med*. 2016;18(3):396-414.
- 475 10. Muniyappa R, Lee S, Chen H, Quon MJ. Current approaches for assessing insulin sensitivity  
476 and resistance in vivo: advantages, limitations, and appropriate usage. *Am J Physiol Endocrinol*  
477 *Metab*. 2008;294(1):E15-26.
- 478 11. DeFronzo RA, Tobin JD, Andres R. Glucose clamp technique: a method for quantifying insulin  
479 secretion and resistance. *Am J Physiol*. 1979;237(3):E214-223.
- 480 12. Owei I, Jain N, Jones D, Umekwe N, Dagogo-Jack S. Physiology of Glycemic Recovery and  
481 Stabilization After Hyperinsulinemic Euglycemic Clamp in Healthy Subjects. *J Clin*  
482 *Endocrinol Metab*. 2018;103(11):4155-4162.
- 483 13. Zhang Y, Xu L, Liu X, Wang Y. Evaluation of insulin sensitivity by hyperinsulinemic-  
484 euglycemic clamps using stable isotope-labeled glucose. *Cell Discov*. 2018;4:17.
- 485 14. Tam CS, Xie W, Johnson WD, Cefalu WT, Redman LM, Ravussin E. Defining insulin  
486 resistance from hyperinsulinemic-euglycemic clamps. *Diabetes Care*. 2012;35(7):1605-1610.
- 487 15. Gerich JE. Is reduced first-phase insulin release the earliest detectable abnormality in  
488 individuals destined to develop type 2 diabetes? *Diabetes*. 2002;51 Suppl 1:S117-121.

- 489 16. Caumo A, Luzi L. First-phase insulin secretion: does it exist in real life? Considerations on  
490 shape and function. *Am J Physiol Endocrinol Metab.* 2004;287(3):E371-385.
- 491 17. Chen M, Porte D, Jr. The effect of rate and dose of glucose infusion on the acute insulin  
492 response in man. *J Clin Endocrinol Metab.* 1976;42(6):1168-1175.
- 493 18. Lu J, Lam SM, Wan Q, Shi L, Huo Y, Chen L, Tang X, Li B, Wu X, Peng K, Li M, Wang S,  
494 Xu Y, Xu M, Bi Y, Ning G, Shui G, Wang W. High-Coverage Targeted Lipidomics Reveals  
495 Novel Serum Lipid Predictors and Lipid Pathway Dysregulation Antecedent to Type 2 Diabetes  
496 Onset in Normoglycemic Chinese Adults. *Diabetes Care.* 2019;42(11):2117-2126.
- 497 19. Gamboa A, Okamoto LE, Arnold AC, Figueroa RA, Diedrich A, Raj SR, Paranjape SY, Farley  
498 G, Abumrad N, Biaggioni I. Autonomic blockade improves insulin sensitivity in obese subjects.  
499 *Hypertension.* 2014;64(4):867-874.
- 500 20. Marin R, Diaz M. Estrogen Interactions With Lipid Rafts Related to Neuroprotection. Impact  
501 of Brain Ageing and Menopause. *Front Neurosci.* 2018;12:128.
- 502 21. Muhle C, Amova V, Biermann T, Bayerlein K, Richter-Schmidinger T, Kraus T, Reichel M,  
503 Gulbins E, Kornhuber J. Sex-dependent decrease of sphingomyelinase activity during alcohol  
504 withdrawal treatment. *Cell Physiol Biochem.* 2014;34(1):71-81.
- 505 22. Fritsche KL. The science of fatty acids and inflammation. *Adv Nutr.* 2015;6(3):293S-301S.
- 506 23. Park J, Kwak CH, Ha SH, Kwon KM, Abekura F, Cho SH, Chang YC, Lee YC, Ha KT, Chung  
507 TW, Kim CH. Ganglioside GM3 suppresses lipopolysaccharide-induced inflammatory  
508 responses in rAW 264.7 macrophage cells through NF-kappaB, AP-1, and MAPKs signaling.  
509 *J Cell Biochem.* 2018;119(1):1173-1182.
- 510 24. Schleicher E, Friess U. Oxidative stress, AGE, and atherosclerosis. *Kidney Int Suppl.*  
511 2007(106):S17-26.
- 512 25. Rauschert S, Uhl O, Koletzko B, Kirchberg F, Mori TA, Huang RC, Beilin LJ, Hellmuth C,  
513 Oddy WH. Lipidomics Reveals Associations of Phospholipids With Obesity and Insulin  
514 Resistance in Young Adults. *J Clin Endocrinol Metab.* 2016;101(3):871-879.
- 515 26. Szpigiel A, Hainault I, Carlier A, Venticlef N, Batto AF, Hajduch E, Bernard C, Ktorza A,  
516 Gautier JF, Ferre P, Bourron O, Foufelle F. Lipid environment induces ER stress, TXNIP  
517 expression and inflammation in immune cells of individuals with type 2 diabetes. *Diabetologia.*  
518 2018;61(2):399-412.
- 519 27. Lemaitre RN, Yu C, Hoofnagle A, Hari N, Jensen PN, Fretts AM, Umans JG, Howard BV,  
520 Sitlani CM, Siscovick DS, King IB, Sotoodehnia N, McKnight B. Circulating Sphingolipids,  
521 Insulin, HOMA-IR, and HOMA-B: The Strong Heart Family Study. *Diabetes.*  
522 2018;67(8):1663-1672.
- 523 28. Hanamatsu H, Ohnishi S, Sakai S, Yuyama K, Mitsutake S, Takeda H, Hashino S, Igarashi Y.  
524 Altered levels of serum sphingomyelin and ceramide containing distinct acyl chains in young  
525 obese adults. *Nutr Diabetes.* 2014;4:e141.
- 526 29. Tulipani S, Palau-Rodriguez M, Minarro Alonso A, Cardona F, Marco-Ramell A, Zonja B,  
527 Lopez de Alda M, Munoz-Garach A, Sanchez-Pla A, Tinahones FJ, Andres-Lacueva C.  
528 Biomarkers of Morbid Obesity and Prediabetes by Metabolomic Profiling of Human  
529 Discordant Phenotypes. *Clin Chim Acta.* 2016;463:53-61.

- 530 30. Chong JR, Xiang P, Wang W, Hind T, Chew WS, Ong WY, Lai MKP, Herr DR.  
531 Sphingolipidomics analysis of large clinical cohorts. Part 2: Potential impact and applications.  
532 *Biochem Biophys Res Commun.* 2018;504(3):602-607.
- 533 31. Merino J, Leong A, Liu CT, Porneala B, Walford GA, von Grotthuss M, Wang TJ, Flannick J,  
534 Dupuis J, Levy D, Gerszten RE, Florez JC, Meigs JB. Metabolomics insights into early type 2  
535 diabetes pathogenesis and detection in individuals with normal fasting glucose. *Diabetologia.*  
536 2018;61(6):1315-1324.
- 537 32. Salgin B, Ong KK, Thankamony A, Emmett P, Wareham NJ, Dunger DB. Higher fasting  
538 plasma free fatty acid levels are associated with lower insulin secretion in children and adults  
539 and a higher incidence of type 2 diabetes. *J Clin Endocrinol Metab.* 2012;97(9):3302-3309.
- 540 33. Oh YS, Bae GD, Baek DJ, Park EY, Jun HS. Fatty Acid-Induced Lipotoxicity in Pancreatic  
541 Beta-Cells During Development of Type 2 Diabetes. *Front Endocrinol (Lausanne).* 2018;9:384.
- 542 34. Acosta-Montano P, Rodriguez-Velazquez E, Ibarra-Lopez E, Frayde-Gomez H, Mas-Oliva J,  
543 Delgado-Coello B, Rivero IA, Alatorre-Meda M, Aguilera J, Guevara-Olaya L, Garcia-  
544 Gonzalez V. Fatty Acid and Lipopolysaccharide Effect on Beta Cells Proteostasis and its  
545 Impact on Insulin Secretion. *Cells.* 2019;8(8).
- 546 35. Pingitore A, Chambers ES, Hill T, Maldonado IR, Liu B, Bewick G, Morrison DJ, Preston T,  
547 Wallis GA, Tedford C, Castanera Gonzalez R, Huang GC, Choudhary P, Frost G, Persaud SJ.  
548 The diet-derived short chain fatty acid propionate improves beta-cell function in humans and  
549 stimulates insulin secretion from human islets in vitro. *Diabetes Obes Metab.* 2017;19(2):257-  
550 265.
- 551 36. Sabrautzki S, Kaiser G, Przemek GKH, Gerst F, Lorza-Gil E, Panse M, Sartorius T, Hoene M,  
552 Marschall S, Haring HU, Hrabe de Angelis M, Ullrich S. Point mutation of *Ffar1* abrogates  
553 fatty acid-dependent insulin secretion, but protects against HFD-induced glucose intolerance.  
554 *Mol Metab.* 2017;6(10):1304-1312.
- 555 37. Eisinger K, Liebisch G, Schmitz G, Aslanidis C, Krautbauer S, Buechler C. Lipidomic analysis  
556 of serum from high fat diet induced obese mice. *Int J Mol Sci.* 2014;15(2):2991-3002.
- 557 38. Miao H, Chen H, Pei S, Bai X, Vaziri ND, Zhao YY. Plasma lipidomics reveal profound  
558 perturbation of glycerophospholipids, fatty acids, and sphingolipids in diet-induced  
559 hyperlipidemia. *Chem Biol Interact.* 2015;228:79-87.
- 560

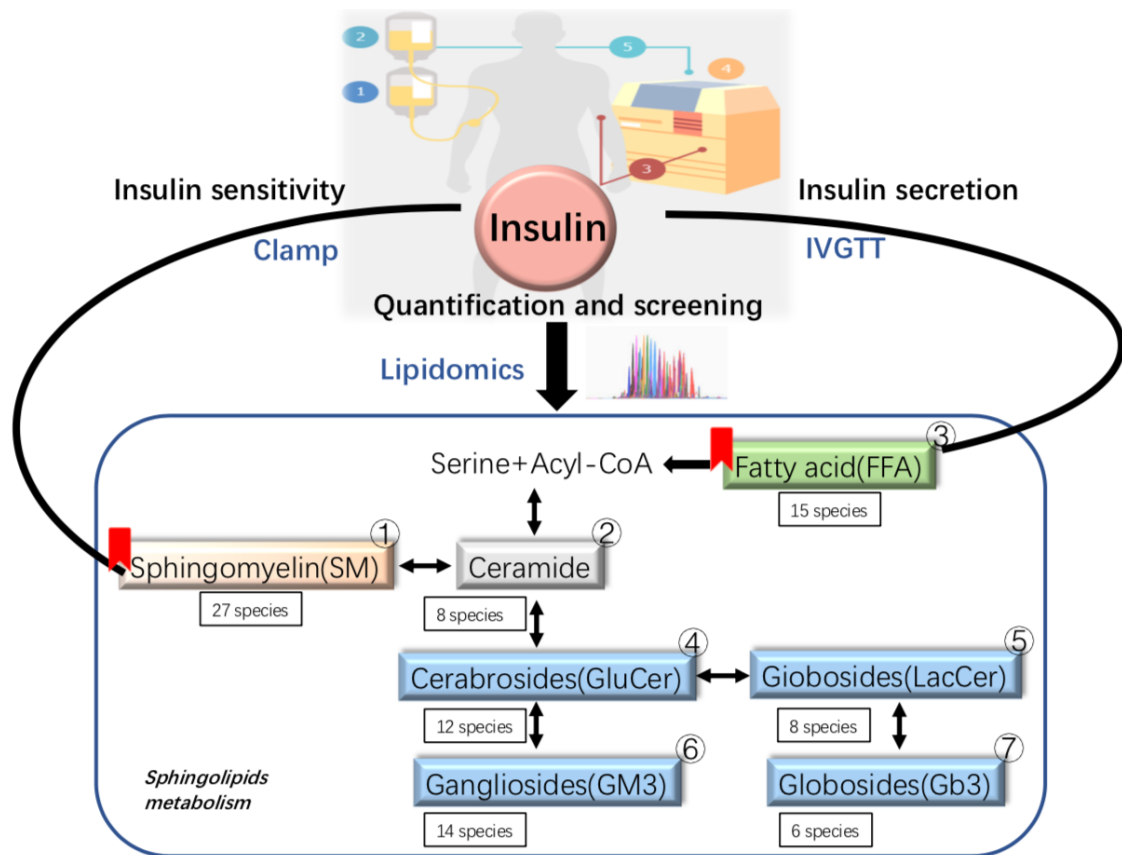

561

562

563 **Figure 1. Study design.**

564 Decreased insulin sensitivity is a multifactorial condition related to obesity, increased inflammation and  
565 dyslipidemia. Lipotoxicity impairs islet function. Sphingolipids are a diverse class of lipids and we  
566 aimed to systematically investigate the changes in serum lipids in individuals and uncover potential  
567 serum sphingolipid predictors for insulin sensitivity and insulin secretion. Serum samples were  
568 analyzed by a targeted lipidomics approach. The glucose infusion rate over 30 minutes ( $GIR_{30}$ ) under  
569 steady conditions was measured by the gold standard hyperinsulinemic-euglycemic clamp, and first-  
570 phase insulin release (FPIR) was evaluated by the intravenous glucose tolerance test (IVGTT).

571

572

573

574

575

576

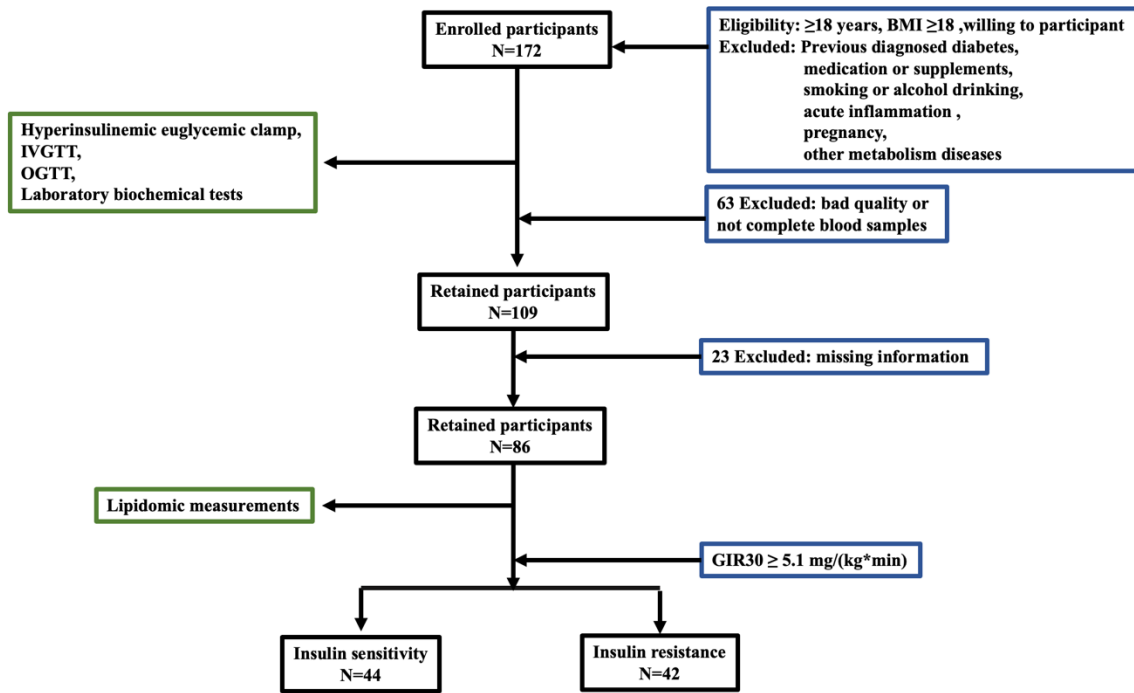

577

578 **Figure 2. Flow chart of the study**

579

580

581

582

583

584

585

586

587

588

589

590

591

592

593

**Table 1 Participants' characteristics divided by GIR<sub>30</sub> (mg / (kg \*min))**

|                          | Insulin sensitivity (GIR <sub>30</sub> ≥ 5.1) |                  | Insulin resistance (GIR <sub>30</sub> < 5.1) |                  | P value             |
|--------------------------|-----------------------------------------------|------------------|----------------------------------------------|------------------|---------------------|
|                          | Mean ± SD                                     | Median(range)    | Mean ± SD                                    | Median(range)    |                     |
| No.(F)                   | 44(25)                                        |                  | 42(21)                                       |                  | 0.53 <sup>a</sup>   |
| Age (years)              | 27.6±8.1                                      | 25.0(18.0-53.0)  | 29.4±8.5                                     | 28(18.0-56.0)    | 0.08 <sup>b</sup>   |
| BMI (kg/m <sup>2</sup> ) | 26.2±7.5                                      | 23.3(18-47)      | 40.4±9.1                                     | 38.5(28.0-69.9)  | <0.001 <sup>b</sup> |
| FBG (mmol/L)             | 5.1±0.6                                       | 4.9(4.2-7.1)     | 6.8±2.7                                      | 5.5(4.3-17.3)    | <0.001 <sup>b</sup> |
| 2hPG (mmol/L)            | 6.8±2.7                                       | 6.0(3.5-20)      | 11.1±4.6                                     | 10.7(3.7-21.6)   | <0.001 <sup>c</sup> |
| TC (mmol/L)              | 4.4±0.8                                       | 4.2(2.8-6.3)     | 5.3±1.1                                      | 5.4(2.9-7.9)     | <0.001 <sup>c</sup> |
| TG (mmol/L)              | 1.1±0.6                                       | 0.9(0.4-2.9)     | 2.6±3.7                                      | 1.8(0.7-23.9)    | <0.001 <sup>b</sup> |
| HDL-c (mmol/L)           | 1.4±0.3                                       | 1.3(0.8-2.1)     | 1.1±0.2                                      | 1.1(0.7-1.6)     | 0.01 <sup>c</sup>   |
| LDL-c (mmol/L)           | 2.6±0.7                                       | 2.5(1.0-4.5)     | 3.4±0.9                                      | 3.4(1.1-5.5)     | <0.001 <sup>b</sup> |
| ALT (U/L)                | 32.7±33.0                                     | 18(8.0-160.6)    | 84.5±79.9                                    | 68.4(6.1-404.8)  | <0.001 <sup>b</sup> |
| AST (U/L)                | 28.3±20.1                                     | 20.5(13.0-104.7) | 58.0±56.1                                    | 43.2(11.2-319.0) | <0.001 <sup>b</sup> |

594 F (female), body mass index (BMI), alanine aminotransferase (ALT), aspartate aminotransferase (AST), total cholesterol (TC), triglyceride  
595 (TG), high density lipoprotein cholesterol (HDL-c), low density lipoprotein cholesterol (LDL-c), fasting blood glucose (FBG), 2-hour  
596 plasma glucose (2hPG). Data are presented as the mean ± SD or median (range). <sup>a</sup> x<sup>2</sup> test. <sup>b</sup> Mann-Whitney U test. <sup>c</sup> Independent samples t  
597 test.

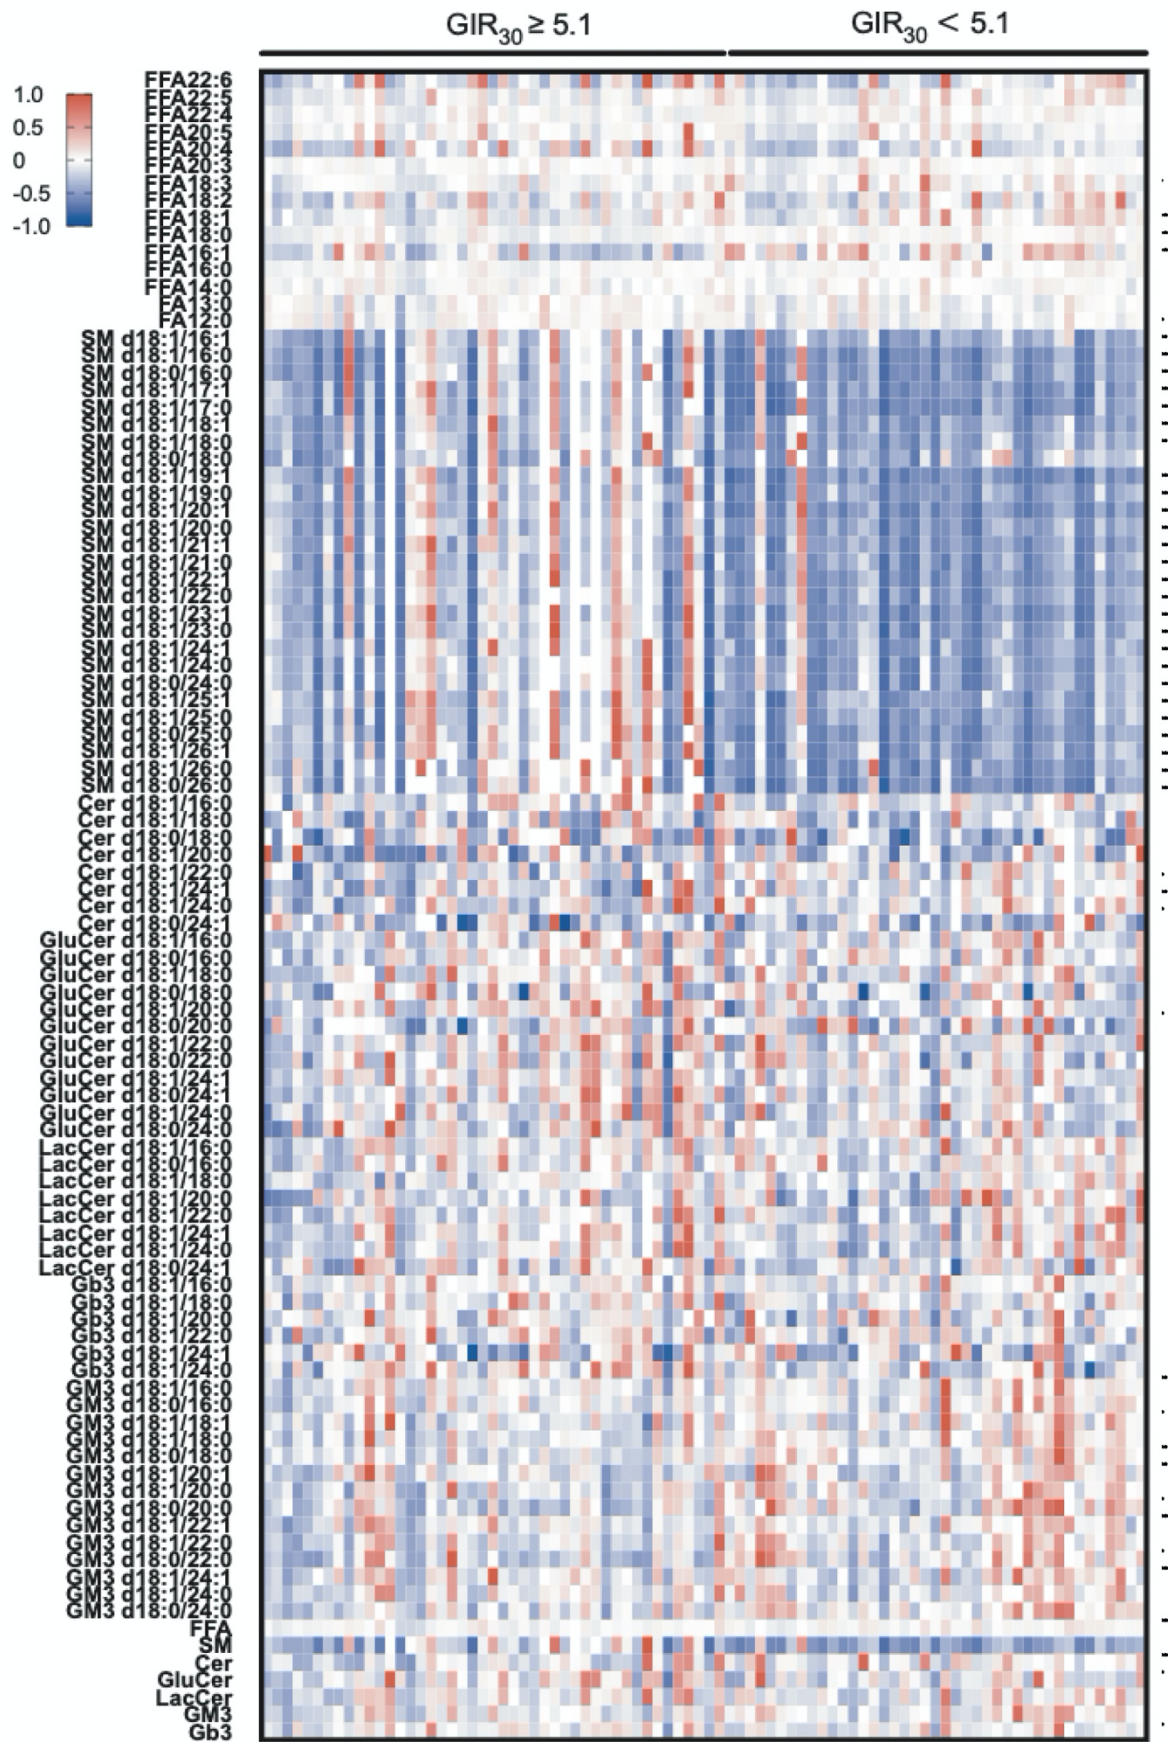

598

599

600 **Figure 3. Serum lipid concentrations in individuals visualized by heatmap.**

601 Each colored cell on the map corresponds to a concentration value. The concentration values were  
602 transformed to -1 (most below average, Blue) to 1 (most above average, Red). The 90 lipid species  
603 from the two groups are presented and range from insulin sensitivity to IR. s: non-IR group, r IR  
604 group.

605

606

607

608

609

610

611

612

613

614

615

616

617

618

619

620

621

622



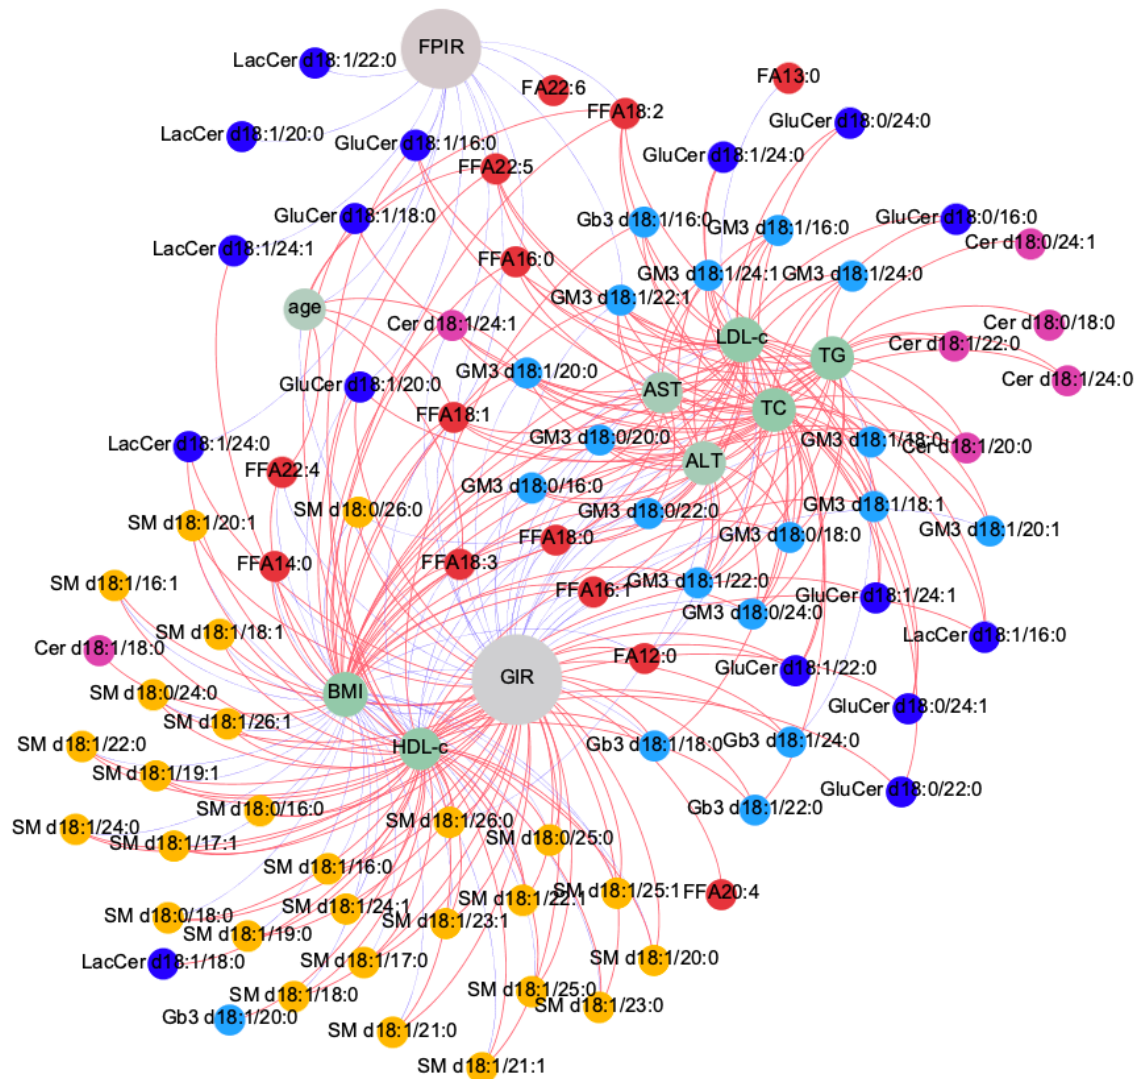

623

624

625 **Figure 4. Correlations between serum lipids and multiple clinical characteristics.**

626 Clinical characteristics network showing lipid correlations with GIR, FPIR (grey nodes) and 8 key  
627 clinical characteristics (green nodes). Pearson's correlation was analyzed (A) and absolute coefficient  
628 values of 0.2 and above are shown ( $P < 0.05$ ). Red edge color indicates positive correlation, while  
629 blue edge indicates negative correlation. Node color is grouped according to lipid type. SM nodes are  
630 yellow, ceramide nodes are pink, GluCer and LacCer nodes are dark blue, FFA nodes are red, and  
631 GM3 and Gb3 nodes are blue.

632

633

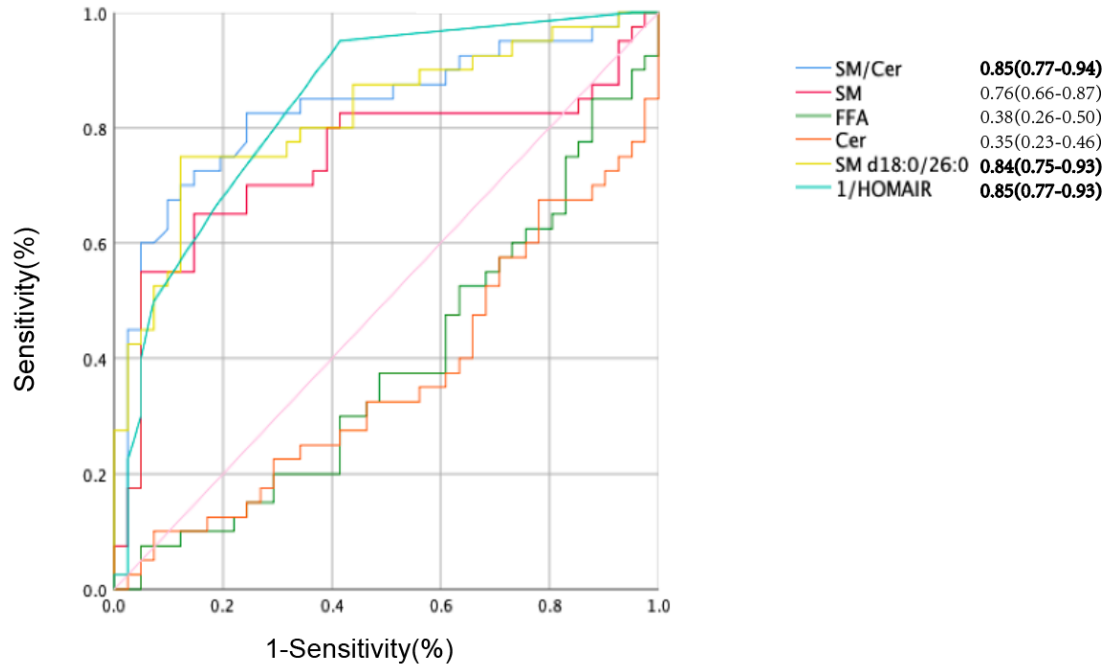

634

635

636

637 **Figure 5. Different noninvasive clinical models or serum biomarkers for defining IR.**

638 Plots of area under the curves (AUC) in the total subjects using  $GIR \geq 5.1$  mg / (kg \*min) as a reference.

639 SM, total serum sphingomyelins; FFA, total serum fatty acids; Cer, total serum ceramides; SM/Cer,

640 total serum sphingomyelins/ total serum ceramides. Model 1: 1/HOMAIR, AUC 0.852; Model 2:

641 SM/Ceramide, AUC 0.851; Model 3, SM d18:0/26:0, AUC 0.839.

642

643

644

645

646

647

648

649

650

651

652

Supplemental Material

653  
654  
655  
656  
657  
658  
659  
660  
661  
662  
663  
664  
665  
666  
667  
668  
669  
670  
671  
672  
673  
674  
675  
676  
677  
678  
679

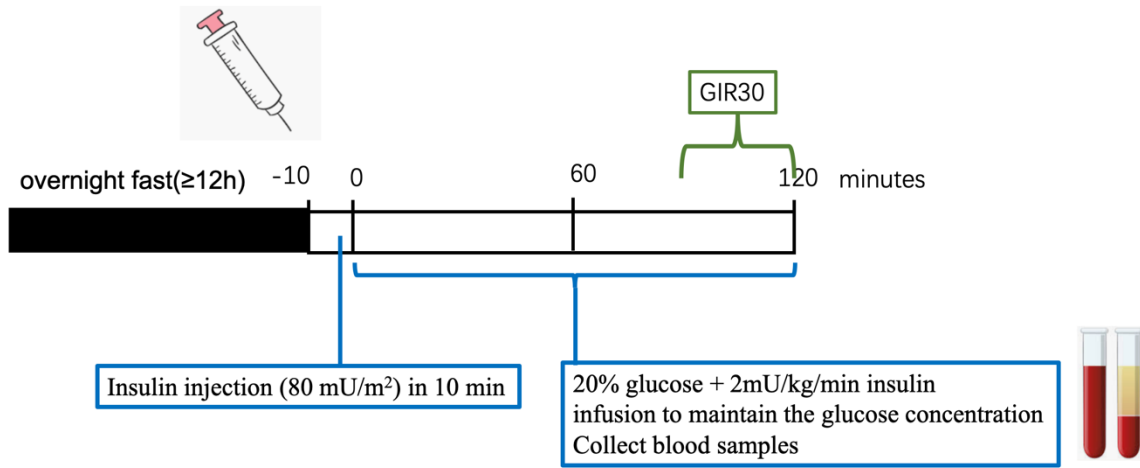

680

681 **Supplementary Figure 1. Flow chart of the hyperinsulinemic euglycemic clamp.**

682

683

684

685

686

687

688

689

690

691

692

693

694

695

696

697

698

699

700

701 **Supplementary Table 1** Gender differences in individual lipid species

| Lipid          | Male (n=40)                      |                    | Female(n=46)                     |                    | P value |                    |                                    |
|----------------|----------------------------------|--------------------|----------------------------------|--------------------|---------|--------------------|------------------------------------|
|                | Average lipid concentration (nM) | Standard deviation | Average lipid concentration (nM) | Standard deviation | t.test  | Man whitney u test | Percentage changed in Female /Male |
| FFA22:6        | 27,383.80                        | 9,766.63           | 28,364.37                        | 11,811.23          | 0.679   | 0.91               | 4%                                 |
| FFA22:5        | 35,394.50                        | 5,727.76           | 34,595.93                        | 5,745.34           | 0.521   | 0.391              | -2%                                |
| FFA22:4        | 46,630.81                        | 5,410.97           | 45,155.79                        | 4,303.44           | 0.163   | 0.307              | -3%                                |
| FFA20:5        | 38,193.91                        | 7,044.16           | 37,642.25                        | 6,542.37           | 0.708   | 0.516              | -1%                                |
| FFA20:4        | 70,539.58                        | 25,512.53          | 72,809.47                        | 34,369.68          | 0.732   | 0.511              | 3%                                 |
| FFA20:3        | 72,926.12                        | 7,350.62           | 71,428.02                        | 5,230.23           | 0.275   | 0.489              | -2%                                |
| FFA18:3        | 21,382.20                        | 4,770.98           | 20,105.87                        | 2,522.77           | 0.135   | 0.345              | -6%                                |
| FFA18:2        | 833,119.63                       | 289,535.66         | 757,961.14                       | 216,305.49         | 0.173   | 0.287              | -9%                                |
| FFA18:1        | 368,217.17                       | 80,349.19          | 353,921.66                       | 64,141.91          | 0.362   | 0.494              | -4%                                |
| FFA18:0        | 2,444,736.12                     | 204,479.00         | 2,492,478.17                     | 245,099.65         | 0.334   | 0.319              | 2%                                 |
| FFA16:1        | 898,803.53                       | 283,053.74         | 868,390.86                       | 265,350.32         | 0.609   | 0.71               | -3%                                |
| FFA16:0        | 2,643,907.12                     | 201,659.98         | 2,667,694.84                     | 222,784.21         | 0.607   | 0.505              | 1%                                 |
| FFA14:0        | 231,903.36                       | 21,691.50          | 228,117.15                       | 19,882.60          | 0.401   | 0.446              | -2%                                |
| FA13:0         | 1,393,717.86                     | 189,564.71         | 1,381,101.56                     | 165,049.25         | 0.742   | 0.368              | -1%                                |
| FA12:0         | 1,573,313.86                     | 215,239.69         | 1,563,687.31                     | 209,107.91         | 0.834   | 0.337              | -1%                                |
| SM d18:1/16:1  | 30,057.81                        | 24,607.53          | 47,297.16                        | 68,494.93          | 0.117   | 0.239              | 57%                                |
| SM d18:1/16:0  | 261,682.84                       | 304,651.82         | 424,500.72                       | 774,554.29         | 0.194   | 0.382              | 62%                                |
| SM d18:0/16:0  | 26,831.28                        | 30,257.85          | 44,211.40                        | 81,235.64          | 0.183   | 0.319              | 65%                                |
| SM d18:1/17:1  | 726.56                           | 905.01             | 1,177.57                         | 1,974.57           | 0.169   | 0.242              | 62%                                |
| SM d18:1/17:0  | 5,109.41                         | 6,623.18           | 7,895.05                         | 14,079.59          | 0.255   | 0.499              | 55%                                |
| SM d18:1/18:1  | 23,088.56                        | 24,590.08          | 38,873.03                        | 62,262.07          | 0.119   | 0.069              | 68%                                |
| SM d18:1/18:0  | 50,774.22                        | 50,941.15          | 79,784.17                        | 127,935.06         | 0.162   | 0.188              | 57%                                |
| SM d18:0/18:0  | 7,032.74                         | 6,030.26           | 10,154.18                        | 13,865.24          | 0.191   | 0.194              | 44%                                |
| SM d18:1/19:1  | 684.52                           | 845.61             | 1,210.39                         | 2,119.81           | 0.127   | 0.139              | 77%                                |
| SM d18:1/19:0  | 2,545.16                         | 3,091.95           | 3,878.42                         | 6,239.70           | 0.224   | 0.275              | 52%                                |
| SM d18:1/20:1  | 12,017.58                        | 13,461.09          | 20,731.21                        | 35,472.11          | 0.128   | 0.242              | 73%                                |
| SM d18:1/20:0  | 34,826.78                        | 38,237.52          | 52,655.08                        | 90,131.98          | 0.248   | 0.562              | 51%                                |
| SM d18:1/21:1  | 1,429.28                         | 1,537.62           | 2,423.55                         | 3,745.42           | 0.104   | 0.052              | 70%                                |
| SM d18:1/21:0  | 7,361.64                         | 8,314.51           | 10,675.81                        | 18,391.14          | 0.297   | 0.653              | 45%                                |
| SM d18:1/22:1  | 46,827.61                        | 49,136.37          | 73,389.35                        | 127,557.32         | 0.219   | 0.494              | 57%                                |
| SM d18:1/22:0  | 74,840.63                        | 73,026.20          | 106,707.91                       | 179,906.53         | 0.298   | 0.856              | 43%                                |
| SM d18:1/23:1  | 18,081.48                        | 21,213.37          | 28,329.23                        | 47,768.35          | 0.214   | 0.287              | 57%                                |
| SM d18:1/23:0  | 26,908.03                        | 29,048.26          | 38,383.33                        | 60,875.30          | 0.279   | 0.527              | 43%                                |
| SM d18:1/24:1  | 157,301.00                       | 171,533.25         | 212,925.04                       | 327,984.16         | 0.338   | 0.609              | 35%                                |
| SM d18:1/24:0  | 65,451.44                        | 61,345.47          | 86,713.95                        | 141,494.70         | 0.381   | 0.802              | 32%                                |
| SM d18:0/24:0  | 6,869.94                         | 5,980.68           | 8,853.64                         | 14,267.69          | 0.415   | 0.634              | 29%                                |
| SM d18:1/25:1  | 3,632.10                         | 4,145.74           | 4,844.12                         | 6,596.36           | 0.319   | 0.467              | 33%                                |
| SM d18:1/25:0  | 2,952.53                         | 3,086.90           | 4,099.75                         | 6,241.02           | 0.294   | 0.762              | 39%                                |
| SM d18:0/25:0  | 1,719.97                         | 1,898.90           | 2,537.14                         | 4,147.75           | 0.255   | 0.579              | 48%                                |
| SM d18:1/26:1  | 1,076.02                         | 1,129.34           | 1,386.10                         | 1,942.26           | 0.377   | 0.808              | 29%                                |
| SM d18:1/26:0  | 548.73                           | 486.92             | 702.80                           | 921.36             | 0.346   | 0.835              | 28%                                |
| SM d18:0/26:0  | 236.94                           | 219.39             | 316.85                           | 422.50             | 0.266   | 0.849              | 34%                                |
| Cer d18:1/16:0 | 733.94                           | 326.00             | 723.88                           | 286.79             | 0.879   | 0.924              | -1%                                |
| Cer d18:1/18:0 | 424.96                           | 373.33             | 362.53                           | 216.39             | 0.338   | 0.467              | -15%                               |
| Cer d18:0/18:0 | 252.42                           | 239.77             | 250.46                           | 198.62             | 0.967   | 0.457              | -1%                                |
| Cer d18:1/20:0 | 359.80                           | 392.06             | 278.40                           | 247.02             | 0.246   | 0.1                | -23%                               |
| Cer d18:1/22:0 | 997.55                           | 430.14             | 1,056.45                         | 515.93             | 0.57    | 0.703              | 6%                                 |
| Cer d18:1/24:1 | 2,181.16                         | 1,118.76           | 2,248.25                         | 1,577.70           | 0.823   | 0.835              | 3%                                 |
| Cer d18:1/24:0 | 3,080.36                         | 1,228.06           | 3,046.26                         | 1,635.38           | 0.914   | 0.489              | -1%                                |
| Cer d18:0/24:1 | 209.60                           | 178.50             | 214.47                           | 171.01             | 0.898   | 0.924              | 2%                                 |

702

|                   |               |            |               |              |              |              |      |
|-------------------|---------------|------------|---------------|--------------|--------------|--------------|------|
| GluCer d18:1/16:0 | 750.59        | 316.45     | 761.92        | 237.13       | 0.85         | 0.603        | 2%   |
| GluCer d18:0/16:0 | 27.41         | 9.86       | 26.78         | 8.36         | 0.747        | 0.788        | -2%  |
| GluCer d18:1/18:0 | 94.80         | 36.00      | 110.10        | 41.65        | 0.074        | 0.089        | 16%  |
| GluCer d18:0/18:0 | 6.98          | 4.18       | 8.03          | 2.97         | 0.181        | <b>0.039</b> | 15%  |
| GluCer d18:1/20:0 | 84.58         | 33.41      | 92.00         | 29.93        | 0.281        | 0.315        | 9%   |
| GluCer d18:0/20:0 | 6.69          | 3.12       | 6.28          | 3.67         | 0.586        | 0.268        | -6%  |
| GluCer d18:1/22:0 | 732.92        | 310.43     | 725.66        | 274.95       | 0.909        | 0.931        | -1%  |
| GluCer d18:0/22:0 | 17.73         | 7.74       | 18.76         | 7.80         | 0.541        | 0.71         | 6%   |
| GluCer d18:1/24:1 | 930.28        | 317.27     | 984.06        | 283.66       | 0.409        | 0.446        | 6%   |
| GluCer d18:0/24:1 | 963.37        | 420.63     | 914.51        | 371.85       | 0.569        | 0.516        | -5%  |
| GluCer d18:1/24:0 | 26.80         | 12.40      | 27.27         | 9.93         | 0.846        | 0.562        | 2%   |
| GluCer d18:0/24:0 | 22.61         | 10.17      | 21.22         | 8.83         | 0.502        | 0.373        | -6%  |
| LacCer d18:1/16:0 | 3,319.71      | 1,121.12   | 3,200.51      | 834.62       | 0.582        | 0.965        | -4%  |
| LacCer d18:0/16:0 | 78.57         | 24.46      | 76.37         | 21.47        | 0.658        | 0.749        | -3%  |
| LacCer d18:1/18:0 | 100.88        | 33.04      | 101.01        | 63.47        | 0.991        | 0.377        | 0%   |
| LacCer d18:1/20:0 | 40.34         | 17.09      | 42.25         | 24.07        | 0.677        | 0.924        | 5%   |
| LacCer d18:1/22:0 | 181.20        | 73.18      | 176.46        | 97.89        | 0.802        | 0.436        | -3%  |
| LacCer d18:1/24:1 | 660.40        | 251.70     | 638.00        | 222.82       | 0.663        | 0.775        | -3%  |
| LacCer d18:1/24:0 | 266.52        | 105.28     | 267.49        | 136.44       | 0.971        | 0.938        | 0%   |
| LacCer d18:0/24:1 | 18.75         | 8.79       | 16.06         | 6.37         | 0.104        | 0.203        | -14% |
| Gb3 d18:1/16:0    | 1,412.52      | 378.84     | 1,452.58      | 326.65       | 0.6          | 0.483        | 3%   |
| Gb3 d18:1/18:0    | 160.89        | 51.28      | 167.72        | 56.60        | 0.561        | 0.755        | 4%   |
| Gb3 d18:1/20:0    | 63.95         | 26.70      | 74.61         | 23.52        | 0.052        | <b>0.009</b> | 17%  |
| Gb3 d18:1/22:0    | 206.38        | 70.35      | 224.67        | 78.68        | 0.262        | 0.332        | 9%   |
| Gb3 d18:1/24:1    | 27.45         | 15.06      | 25.83         | 14.33        | 0.611        | 0.671        | -6%  |
| Gb3 d18:1/24:0    | 81.59         | 28.43      | 77.97         | 31.65        | 0.58         | 0.467        | -4%  |
| GM3 d18:1/16:0    | 3,403.98      | 967.45     | 3,295.38      | 790.38       | 0.568        | 0.788        | -3%  |
| GM3 d18:0/16:0    | 723.50        | 220.45     | 686.62        | 163.95       | 0.377        | 0.849        | -5%  |
| GM3 d18:1/18:1    | 387.44        | 119.25     | 359.98        | 123.08       | 0.298        | 0.246        | -7%  |
| GM3 d18:1/18:0    | 1,559.14      | 427.58     | 1,301.05      | 362.73       | <b>0.003</b> | <b>0.003</b> | -17% |
| GM3 d18:0/18:0    | 562.20        | 125.24     | 508.78        | 141.29       | 0.069        | <b>0.038</b> | -10% |
| GM3 d18:1/20:1    | 194.20        | 67.06      | 188.98        | 67.63        | 0.721        | 0.723        | -3%  |
| GM3 d18:1/20:0    | 698.33        | 251.91     | 594.50        | 191.91       | <b>0.037</b> | <b>0.045</b> | -15% |
| GM3 d18:0/20:0    | 191.02        | 71.34      | 168.85        | 69.51        | 0.149        | 0.109        | -12% |
| GM3 d18:1/22:1    | 873.83        | 285.60     | 828.96        | 233.36       | 0.425        | 0.808        | -5%  |
| GM3 d18:1/22:0    | 1,949.95      | 689.83     | 1,735.82      | 565.09       | 0.117        | 0.13         | -11% |
| GM3 d18:0/22:0    | 531.34        | 214.52     | 465.81        | 211.41       | 0.158        | 0.096        | -12% |
| GM3 d18:1/24:1    | 2,522.35      | 821.36     | 2,343.51      | 729.56       | 0.288        | 0.337        | -7%  |
| GM3 d18:1/24:0    | 1,938.94      | 625.09     | 1,683.28      | 456.44       | <b>0.036</b> | 0.06         | -13% |
| GM3 d18:0/24:0    | 477.69        | 137.55     | 466.07        | 138.48       | 0.698        | 0.622        | -2%  |
| FFA               | 10,700,169.57 | 895,473.03 | 10,623,454.39 | 947,850.78   | 0.702        | 0.634        | -1%  |
| SM                | 870,614.80    | 928,565.89 | 1,314,656.93  | 2,215,685.17 | 0.241        | 0.544        | 51%  |
| Cer               | 8,239.79      | 2,722.51   | 8,180.70      | 3,918.70     | 0.936        | 0.426        | -1%  |
| GluCer            | 3,664.76      | 1,394.08   | 3,696.58      | 1,189.34     | 0.909        | 0.869        | 1%   |
| LacCer            | 4,666.37      | 1,536.55   | 4,518.14      | 1,260.03     | 0.624        | 0.89         | -3%  |
| GM3               | 16,013.92     | 4,316.51   | 14,627.60     | 3,612.06     | 0.109        | 0.136        | -9%  |
| Gb3               | 1,952.78      | 499.64     | 2,023.37      | 471.45       | 0.502        | 0.653        | 4%   |
| SM/Cer            | 108.53        | 114.39     | 180.94        | 301.07       | 0.136        | 0.539        | 67%  |

703

704

705

706

707

708 **Supplementary Table 2** Age differences in individual lipid species

| Lipids         | Age ≤ 26 (n=43)                  |                    | Age > 26 (n=43)                  |                    | P value      |                    | Percentage changed in age |
|----------------|----------------------------------|--------------------|----------------------------------|--------------------|--------------|--------------------|---------------------------|
|                | Average lipid concentration (nM) | Standard deviation | Average lipid concentration (nM) | Standard deviation | t.test       | Man whitney u test |                           |
| FFA22:6        | 25,664.85                        | 10,909.68          | 30,151.73                        | 10,450.19          | 0.055        | <b>0.009</b>       | 17%                       |
| FFA22:5        | 32,676.18                        | 4,628.27           | 37,258.53                        | 5,829.72           | <b>0.000</b> | <b>0.000</b>       | 14%                       |
| FFA22:4        | 44,495.41                        | 3,982.61           | 47,188.29                        | 5,344.60           | <b>0.010</b> | <b>0.023</b>       | 6%                        |
| FFA20:5        | 37,143.60                        | 7,624.72           | 38,654.07                        | 5,725.95           | 0.302        | <b>0.049</b>       | 4%                        |
| FFA20:4        | 69,792.26                        | 29,525.78          | 73,715.15                        | 31,512.28          | 0.553        | 0.113              | 6%                        |
| FFA20:3        | 70,432.19                        | 5,427.57           | 73,817.44                        | 6,730.52           | <b>0.012</b> | <b>0.008</b>       | 5%                        |
| FFA18:3        | 19,424.87                        | 2,551.20           | 21,974.15                        | 4,353.13           | <b>0.001</b> | <b>0.001</b>       | 13%                       |
| FFA18:2        | 694,918.69                       | 193,721.87         | 890,918.47                       | 271,398.54         | <b>0.000</b> | <b>0.000</b>       | 28%                       |
| FFA18:1        | 330,532.70                       | 53,962.63          | 390,608.76                       | 75,812.34          | <b>0.000</b> | <b>0.000</b>       | 18%                       |
| FFA18:0        | 2,406,859.07                     | 237,006.03         | 2,533,686.06                     | 199,862.86         | <b>0.009</b> | <b>0.010</b>       | 5%                        |
| FFA16:1        | 838,192.23                       | 270,514.95         | 926,880.34                       | 270,375.93         | 0.132        | 0.111              | 11%                       |
| FFA16:0        | 2,596,906.98                     | 213,413.67         | 2,716,354.58                     | 195,905.92         | <b>0.008</b> | <b>0.004</b>       | 5%                        |
| FFA14:0        | 225,165.36                       | 20,514.97          | 234,591.00                       | 20,035.65          | <b>0.034</b> | 0.073              | 4%                        |
| FA13:0         | 1,383,897.97                     | 184,211.09         | 1,390,041.25                     | 169,360.87         | 0.872        | 0.65               | 0%                        |
| FA12:0         | 1,574,468.00                     | 218,118.19         | 1,561,861.55                     | 205,569.19         | 0.783        | 0.969              | -1%                       |
| SM d18:1/16:1  | 47,803.64                        | 70,685.87          | 30,754.08                        | 24,393.51          | 0.139        | 0.323              | -36%                      |
| SM d18:1/16:0  | 448,597.44                       | 798,519.85         | 248,945.51                       | 290,577.87         | 0.127        | 0.2                | -45%                      |
| SM d18:0/16:0  | 46,260.37                        | 83,806.11          | 25,994.88                        | 28,998.68          | 0.138        | 0.222              | -44%                      |
| SM d18:1/17:1  | 1,207.23                         | 2,033.47           | 728.37                           | 888.38             | 0.161        | 0.263              | -40%                      |
| SM d18:1/17:0  | 8,352.34                         | 14,503.31          | 4,846.46                         | 6,359.45           | 0.150        | 0.171              | -42%                      |
| SM d18:1/18:1  | 39,237.53                        | 64,227.32          | 23,825.31                        | 24,395.07          | 0.145        | 0.185              | -39%                      |
| SM d18:1/18:0  | 81,892.35                        | 131,904.76         | 50,689.99                        | 49,775.32          | 0.150        | 0.245              | -38%                      |
| SM d18:0/18:0  | 10,140.52                        | 14,339.18          | 7,264.17                         | 5,904.19           | 0.227        | 0.694              | -28%                      |
| SM d18:1/19:1  | 1,255.75                         | 2,181.41           | 675.86                           | 829.90             | 0.107        | 0.061              | -46%                      |
| SM d18:1/19:0  | 3,973.47                         | 6,438.94           | 2,543.12                         | 2,998.39           | 0.190        | 0.336              | -36%                      |
| SM d18:1/20:1  | 21,452.24                        | 36,504.16          | 11,904.48                        | 13,261.38          | 0.111        | 0.121              | -45%                      |
| SM d18:1/20:0  | 54,530.10                        | 92,935.16          | 34,195.59                        | 37,081.26          | 0.186        | 0.385              | -37%                      |
| SM d18:1/21:1  | 2,442.31                         | 3,865.52           | 1,479.89                         | 1,520.77           | 0.132        | 0.188              | -39%                      |
| SM d18:1/21:0  | 11,098.66                        | 18,995.34          | 7,170.01                         | 7,966.07           | 0.215        | 0.487              | -35%                      |
| SM d18:1/22:1  | 77,117.32                        | 131,391.34         | 44,952.78                        | 47,340.52          | 0.135        | 0.132              | -42%                      |
| SM d18:1/22:0  | 113,955.80                       | 185,271.33         | 69,816.03                        | 69,459.72          | 0.147        | 0.168              | -39%                      |
| SM d18:1/23:1  | 29,840.28                        | 49,233.44          | 17,285.38                        | 20,286.50          | 0.126        | 0.141              | -42%                      |
| SM d18:1/23:0  | 40,411.11                        | 62,807.51          | 25,680.85                        | 27,663.27          | 0.163        | 0.218              | -36%                      |
| SM d18:1/24:1  | 225,164.02                       | 337,144.44         | 148,942.76                       | 165,876.97         | 0.187        | 0.121              | -34%                      |
| SM d18:1/24:0  | 93,791.48                        | 145,581.58         | 59,857.34                        | 58,241.73          | 0.160        | 0.197              | -36%                      |
| SM d18:0/24:0  | 9,596.96                         | 14,682.48          | 6,265.02                         | 5,662.81           | 0.169        | 0.302              | -35%                      |
| SM d18:1/25:1  | 5,074.90                         | 6,751.28           | 3,485.87                         | 4,056.53           | 0.189        | <b>0.046</b>       | -31%                      |
| SM d18:1/25:0  | 4,351.82                         | 6,397.48           | 2,780.50                         | 3,009.93           | 0.149        | 0.086              | -36%                      |
| SM d18:0/25:0  | 2,703.21                         | 4,256.07           | 1,610.91                         | 1,842.91           | 0.126        | 0.065              | -40%                      |
| SM d18:1/26:1  | 1,476.26                         | 1,987.36           | 1,007.49                         | 1,101.38           | 0.180        | 0.07               | -32%                      |
| SM d18:1/26:0  | 774.38                           | 949.39             | 487.90                           | 445.45             | 0.077        | 0.123              | -37%                      |
| SM d18:0/26:0  | 347.91                           | 429.81             | 211.46                           | 211.98             | 0.065        | 0.07               | -39%                      |
| Cer d18:1/16:0 | 733.36                           | 278.67             | 723.76                           | 330.39             | 0.885        | 0.434              | -1%                       |
| Cer d18:1/18:0 | 396.83                           | 217.33             | 386.31                           | 366.45             | 0.872        | 0.228              | -3%                       |
| Cer d18:0/18:0 | 250.92                           | 195.82             | 251.82                           | 239.39             | 0.985        | 0.543              | 0%                        |
| Cer d18:1/20:0 | 288.39                           | 180.52             | 344.14                           | 421.08             | 0.427        | 0.839              | 19%                       |
| Cer d18:1/22:0 | 994.94                           | 515.38             | 1,063.16                         | 436.77             | 0.510        | 0.235              | 7%                        |
| Cer d18:1/24:1 | 1,884.11                         | 859.78             | 2,549.98                         | 1,692.71           | <b>0.024</b> | <b>0.038</b>       | 35%                       |
| Cer d18:1/24:0 | 2,705.28                         | 1,173.58           | 3,418.96                         | 1,621.26           | <b>0.022</b> | <b>0.012</b>       | 26%                       |
| Cer d18:0/24:1 | 199.25                           | 128.68             | 225.16                           | 209.82             | 0.492        | 0.4                | 13%                       |

709

|                   |               |              |               |            |              |              |      |
|-------------------|---------------|--------------|---------------|------------|--------------|--------------|------|
| GluCer d18:1/16:0 | 780.49        | 293.25       | 732.81        | 257.19     | 0.425        | 0.694        | -6%  |
| GluCer d18:0/16:0 | 27.49         | 9.59         | 26.66         | 8.55       | 0.674        | 0.806        | -3%  |
| GluCer d18:1/18:0 | 102.43        | 40.86        | 103.53        | 38.87      | 0.898        | 0.575        | 1%   |
| GluCer d18:0/18:0 | 8.07          | 3.61         | 7.01          | 3.55       | 0.172        | 0.245        | -13% |
| GluCer d18:1/20:0 | 88.98         | 34.66        | 88.12         | 28.69      | 0.900        | 0.894        | -1%  |
| GluCer d18:0/20:0 | 6.53          | 3.36         | 6.41          | 3.50       | 0.874        | 0.792        | -2%  |
| GluCer d18:1/22:0 | 747.40        | 327.65       | 710.68        | 249.93     | 0.561        | 0.931        | -5%  |
| GluCer d18:0/22:0 | 19.35         | 8.13         | 17.21         | 7.27       | 0.202        | 0.308        | -11% |
| GluCer d18:1/24:1 | 982.35        | 324.90       | 935.74        | 272.91     | 0.473        | 0.839        | -5%  |
| GluCer d18:0/24:1 | 961.44        | 444.42       | 913.03        | 339.03     | 0.572        | 0.99         | -5%  |
| GluCer d18:1/24:0 | 27.18         | 11.99        | 26.92         | 10.22      | 0.912        | 0.863        | -1%  |
| GluCer d18:0/24:0 | 23.29         | 10.37        | 20.44         | 8.30       | 0.162        | 0.284        | -12% |
| LacCer d18:1/16:0 | 3,116.73      | 927.56       | 3,395.17      | 1,010.28   | 0.187        | 0.158        | 9%   |
| LacCer d18:0/16:0 | 75.82         | 24.32        | 78.97         | 21.33      | 0.524        | 0.429        | 4%   |
| LacCer d18:1/18:0 | 104.41        | 64.03        | 97.49         | 34.72      | 0.535        | 0.736        | -7%  |
| LacCer d18:1/20:0 | 42.88         | 25.26        | 39.85         | 15.85      | 0.508        | 0.789        | -7%  |
| LacCer d18:1/22:0 | 178.95        | 103.59       | 178.38        | 67.23      | 0.976        | 0.492        | 0%   |
| LacCer d18:1/24:1 | 660.78        | 255.14       | 636.05        | 216.49     | 0.629        | 0.894        | -4%  |
| LacCer d18:1/24:0 | 271.48        | 146.86       | 262.59        | 92.89      | 0.738        | 0.812        | -3%  |
| LacCer d18:0/24:1 | 17.04         | 6.83         | 17.58         | 8.49       | 0.744        | 0.832        | 3%   |
| Gb3 d18:1/16:0    | 1,398.17      | 314.51       | 1,469.74      | 383.23     | 0.347        | 0.218        | 5%   |
| Gb3 d18:1/18:0    | 160.73        | 53.32        | 168.35        | 55.00      | 0.516        | 0.442        | 5%   |
| Gb3 d18:1/20:0    | 71.47         | 24.72        | 67.83         | 26.36      | 0.510        | 0.344        | -5%  |
| Gb3 d18:1/22:0    | 213.78        | 69.17        | 218.54        | 81.25      | 0.771        | 0.969        | 2%   |
| Gb3 d18:1/24:1    | 26.62         | 10.46        | 26.54         | 17.96      | 0.980        | 0.252        | 0%   |
| Gb3 d18:1/24:0    | 80.69         | 29.30        | 78.62         | 31.14      | 0.752        | 0.887        | -3%  |
| GM3 d18:1/16:0    | 3,164.27      | 745.19       | 3,527.52      | 959.98     | 0.053        | 0.059        | 11%  |
| GM3 d18:0/16:0    | 656.82        | 172.45       | 750.74        | 200.90     | <b>0.022</b> | <b>0.027</b> | 14%  |
| GM3 d18:1/18:1    | 352.47        | 114.04       | 393.04        | 126.39     | 0.122        | 0.121        | 12%  |
| GM3 d18:1/18:0    | 1,331.05      | 361.03       | 1,511.14      | 444.67     | <b>0.042</b> | 0.088        | 14%  |
| GM3 d18:0/18:0    | 518.18        | 123.86       | 549.07        | 146.89     | 0.295        | 0.455        | 6%   |
| GM3 d18:1/20:1    | 182.87        | 73.94        | 199.95        | 58.94      | 0.240        | <b>0.047</b> | 9%   |
| GM3 d18:1/20:0    | 582.33        | 206.64       | 703.26        | 231.72     | <b>0.012</b> | <b>0.009</b> | 21%  |
| GM3 d18:0/20:0    | 168.35        | 69.42        | 189.97        | 71.38      | 0.158        | 0.102        | 13%  |
| GM3 d18:1/22:1    | 785.34        | 231.35       | 914.33        | 270.32     | <b>0.020</b> | <b>0.026</b> | 16%  |
| GM3 d18:1/22:0    | 1,669.14      | 552.09       | 2,001.69      | 667.80     | <b>0.014</b> | <b>0.011</b> | 20%  |
| GM3 d18:0/22:0    | 430.96        | 182.68       | 561.61        | 225.16     | <b>0.004</b> | <b>0.001</b> | 30%  |
| GM3 d18:1/24:1    | 2,292.58      | 758.54       | 2,560.80      | 775.11     | 0.109        | 0.098        | 12%  |
| GM3 d18:1/24:0    | 1,697.03      | 521.51       | 1,907.36      | 569.85     | 0.078        | 0.059        | 12%  |
| GM3 d18:0/24:0    | 435.18        | 133.48       | 507.77        | 132.93     | <b>0.013</b> | <b>0.010</b> | 17%  |
| FFA               | 10,350,570.37 | 866,866.65   | 10,967,701.37 | 873,939.57 | <b>0.001</b> | <b>0.003</b> | 6%   |
| SM                | 1,382,849.40  | 2,282,469.10 | 833,402.02    | 892,639.92 | 0.145        | 0.191        | -40% |
| Cer               | 7,453.08      | 2,426.09     | 8,963.28      | 4,035.35   | <b>0.038</b> | <b>0.035</b> | 20%  |
| GluCer            | 3,775.01      | 1,434.61     | 3,588.55      | 1,115.71   | 0.503        | 0.983        | -5%  |
| LacCer            | 4,468.08      | 1,426.28     | 4,706.09      | 1,356.97   | 0.430        | 0.271        | 5%   |
| GM3               | 14,266.55     | 3,661.59     | 16,278.25     | 4,096.39   | <b>0.019</b> | <b>0.019</b> | 14%  |
| Gb3               | 1,951.46      | 441.57       | 2,029.62      | 523.81     | 0.456        | 0.323        | 4%   |
| SM/Cer            | 192.98        | 307.62       | 101.54        | 114.15     | 0.071        | <b>0.005</b> | -47% |

710

711

712

713

714



715 **Supplementary Table 3** BMI differences in individual lipid species

| Lipid          | BMI ≤ 30(n=34)                   |                    | BMI > 30(n=52)                   |                    | P value      |                    | Percentage changed in BMI |
|----------------|----------------------------------|--------------------|----------------------------------|--------------------|--------------|--------------------|---------------------------|
|                | Average lipid concentration (nM) | Standard deviation | Average lipid concentration (nM) | Standard deviation | t.test       | Man whitney u test |                           |
| FFA22:6        | 28,078.23                        | 12,368.87          | 27,797.17                        | 9,869.88           | 0.907        | 0.566              | -1%                       |
| FFA22:5        | 33,321.12                        | 5,503.46           | 36,043.74                        | 5,647.54           | <b>0.030</b> | <b>0.016</b>       | 8%                        |
| FFA22:4        | 44,312.67                        | 4,178.58           | 46,841.70                        | 5,076.11           | <b>0.018</b> | <b>0.033</b>       | 6%                        |
| FFA20:5        | 38,560.37                        | 7,642.17           | 37,466.30                        | 6,129.19           | 0.465        | 0.314              | -3%                       |
| FFA20:4        | 78,129.91                        | 34,027.62          | 67,584.65                        | 27,352.51          | 0.117        | 0.179              | -13%                      |
| FFA20:3        | 71,944.61                        | 4,630.44           | 72,242.64                        | 7,244.83           | 0.832        | 0.888              | 0%                        |
| FFA18:3        | 19,197.70                        | 1,903.41           | 21,681.46                        | 4,344.47           | <b>0.002</b> | <b>0.005</b>       | 13%                       |
| FFA18:2        | 716,912.44                       | 202,382.81         | 842,614.90                       | 273,655.14         | <b>0.024</b> | <b>0.026</b>       | 18%                       |
| FFA18:1        | 326,522.06                       | 50,065.75          | 382,833.32                       | 75,846.63          | <b>0.000</b> | <b>0.000</b>       | 17%                       |
| FFA18:0        | 2,341,076.75                     | 228,413.05         | 2,554,746.75                     | 183,776.91         | <b>0.000</b> | <b>0.000</b>       | 9%                        |
| FFA16:1        | 704,815.69                       | 170,654.92         | 998,738.22                       | 264,791.55         | <b>0.000</b> | <b>0.000</b>       | 42%                       |
| FFA16:0        | 2,589,493.93                     | 200,408.96         | 2,700,527.95                     | 210,169.41         | <b>0.017</b> | <b>0.007</b>       | 4%                        |
| FFA14:0        | 225,100.94                       | 21,412.92          | 233,001.76                       | 19,818.84          | 0.084        | 0.145              | 4%                        |
| FA13:0         | 1,449,118.91                     | 131,812.46         | 1,346,333.52                     | 189,951.78         | <b>0.007</b> | <b>0.010</b>       | -7%                       |
| FA12:0         | 1,674,743.20                     | 152,780.30         | 1,498,478.89                     | 215,454.45         | <b>0.000</b> | <b>0.000</b>       | -11%                      |
| SM d18:1/16:1  | 60,565.24                        | 79,183.95          | 25,360.84                        | 13,062.66          | <b>0.002</b> | <b>0.000</b>       | -58%                      |
| SM d18:1/16:0  | 611,441.82                       | 902,116.67         | 177,025.48                       | 93,762.93          | <b>0.001</b> | <b>0.000</b>       | -71%                      |
| SM d18:0/16:0  | 61,724.06                        | 94,785.90          | 19,391.49                        | 10,672.34          | <b>0.002</b> | <b>0.000</b>       | -69%                      |
| SM d18:1/17:1  | 1,680.50                         | 2,326.77           | 501.80                           | 297.96             | <b>0.001</b> | <b>0.000</b>       | -70%                      |
| SM d18:1/17:0  | 11,710.72                        | 16,663.35          | 3,257.39                         | 1,800.38           | <b>0.000</b> | <b>0.000</b>       | -72%                      |
| SM d18:1/18:1  | 50,935.49                        | 73,338.30          | 18,844.14                        | 9,595.42           | <b>0.002</b> | <b>0.000</b>       | -63%                      |
| SM d18:1/18:0  | 104,925.51                       | 150,936.34         | 41,030.26                        | 19,809.65          | <b>0.003</b> | <b>0.000</b>       | -61%                      |
| SM d18:0/18:0  | 11,731.39                        | 16,438.16          | 6,721.82                         | 4,069.80           | <b>0.038</b> | 0.179              | -43%                      |
| SM d18:1/19:1  | 1,728.26                         | 2,464.62           | 467.27                           | 237.34             | <b>0.000</b> | <b>0.000</b>       | -73%                      |
| SM d18:1/19:0  | 5,470.81                         | 7,495.70           | 1,811.65                         | 810.68             | <b>0.001</b> | <b>0.000</b>       | -67%                      |
| SM d18:1/20:1  | 29,081.30                        | 41,074.13          | 8,568.75                         | 4,404.92           | <b>0.001</b> | <b>0.000</b>       | -71%                      |
| SM d18:1/20:0  | 73,886.08                        | 106,489.76         | 25,059.19                        | 10,988.69          | <b>0.001</b> | <b>0.000</b>       | -66%                      |
| SM d18:1/21:1  | 3,295.58                         | 4,375.20           | 1,088.55                         | 500.72             | <b>0.001</b> | <b>0.000</b>       | -67%                      |
| SM d18:1/21:0  | 15,484.78                        | 21,775.64          | 4,982.12                         | 2,151.46           | <b>0.001</b> | <b>0.000</b>       | -68%                      |
| SM d18:1/22:1  | 105,030.06                       | 147,834.73         | 32,269.08                        | 14,943.29          | <b>0.001</b> | <b>0.000</b>       | -69%                      |
| SM d18:1/22:0  | 153,109.78                       | 209,369.69         | 51,854.93                        | 23,781.50          | <b>0.001</b> | <b>0.000</b>       | -66%                      |
| SM d18:1/23:1  | 41,679.97                        | 55,757.39          | 11,717.01                        | 5,293.20           | <b>0.000</b> | <b>0.000</b>       | -72%                      |
| SM d18:1/23:0  | 55,801.62                        | 71,746.16          | 18,167.29                        | 8,285.92           | <b>0.000</b> | <b>0.000</b>       | -67%                      |
| SM d18:1/24:1  | 302,621.24                       | 396,328.89         | 111,489.80                       | 48,505.44          | <b>0.001</b> | <b>0.000</b>       | -63%                      |
| SM d18:1/24:0  | 126,778.10                       | 164,810.13         | 44,162.38                        | 20,145.88          | <b>0.001</b> | <b>0.000</b>       | -65%                      |
| SM d18:0/24:0  | 12,857.67                        | 16,537.36          | 4,709.70                         | 2,213.39           | <b>0.001</b> | <b>0.000</b>       | -63%                      |
| SM d18:1/25:1  | 6,946.61                         | 8,161.53           | 2,537.09                         | 1,101.59           | <b>0.000</b> | <b>0.000</b>       | -63%                      |
| SM d18:1/25:0  | 5,995.87                         | 7,358.96           | 1,977.50                         | 810.54             | <b>0.000</b> | <b>0.000</b>       | -67%                      |
| SM d18:0/25:0  | 3,771.08                         | 4,836.57           | 1,101.74                         | 457.07             | <b>0.000</b> | <b>0.000</b>       | -71%                      |
| SM d18:1/26:1  | 2,022.01                         | 2,343.12           | 731.78                           | 347.42             | <b>0.000</b> | <b>0.000</b>       | -64%                      |
| SM d18:1/26:0  | 1,056.00                         | 1,032.92           | 353.35                           | 225.65             | <b>0.000</b> | <b>0.000</b>       | -67%                      |
| SM d18:0/26:0  | 490.32                           | 466.67             | 141.96                           | 84.59              | <b>0.000</b> | <b>0.000</b>       | -71%                      |
| Cer d18:1/16:0 | 768.32                           | 260.13             | 702.55                           | 329.17             | 0.329        | 0.050              | -9%                       |
| Cer d18:1/18:0 | 406.48                           | 238.88             | 381.82                           | 335.20             | 0.711        | 0.354              | -6%                       |
| Cer d18:0/18:0 | 295.69                           | 204.71             | 222.40                           | 222.47             | 0.127        | <b>0.010</b>       | -25%                      |
| Cer d18:1/20:0 | 303.88                           | 178.48             | 324.36                           | 391.64             | 0.776        | 0.442              | 7%                        |
| Cer d18:1/22:0 | 959.13                           | 515.51             | 1,074.77                         | 447.73             | 0.273        | 0.082              | 12%                       |
| Cer d18:1/24:1 | 1,818.55                         | 945.36             | 2,477.60                         | 1,549.82           | <b>0.029</b> | <b>0.006</b>       | 36%                       |
| Cer d18:1/24:0 | 2,853.35                         | 1,242.83           | 3,198.62                         | 1,570.38           | 0.261        | 0.247              | 12%                       |
| Cer d18:0/24:1 | 219.19                           | 177.70             | 207.64                           | 172.31             | 0.765        | 0.784              | -5%                       |

716

|                   |               |              |               |            |              |              |      |
|-------------------|---------------|--------------|---------------|------------|--------------|--------------|------|
| GluCer d18:1/16:0 | 784.60        | 245.30       | 738.37        | 294.03     | 0.450        | 0.372        | -6%  |
| GluCer d18:0/16:0 | 27.48         | 7.82         | 26.80         | 9.82       | 0.735        | 0.612        | -2%  |
| GluCer d18:1/18:0 | 109.77        | 45.36        | 98.55         | 35.18      | 0.201        | 0.440        | -10% |
| GluCer d18:0/18:0 | 7.81          | 3.24         | 7.36          | 3.84       | 0.574        | 0.668        | -6%  |
| GluCer d18:1/20:0 | 98.59         | 31.76        | 81.98         | 30.06      | <b>0.016</b> | <b>0.023</b> | -17% |
| GluCer d18:0/20:0 | 6.63          | 3.27         | 6.37          | 3.53       | 0.728        | 0.422        | -4%  |
| GluCer d18:1/22:0 | 818.39        | 301.50       | 670.62        | 269.81     | <b>0.020</b> | <b>0.020</b> | -18% |
| GluCer d18:0/22:0 | 19.89         | 8.06         | 17.23         | 7.42       | 0.120        | 0.185        | -13% |
| GluCer d18:1/24:1 | 998.62        | 287.32       | 933.17        | 306.66     | 0.324        | 0.354        | -7%  |
| GluCer d18:0/24:1 | 1,021.02      | 377.25       | 882.46        | 398.10     | 0.108        | <b>0.040</b> | -14% |
| GluCer d18:1/24:0 | 28.43         | 11.08        | 26.15         | 11.09      | 0.355        | 0.223        | -8%  |
| GluCer d18:0/24:0 | 22.64         | 9.62         | 21.36         | 9.39       | 0.547        | 0.480        | -6%  |
| LacCer d18:1/16:0 | 3,244.60      | 931.64       | 3,263.37      | 1,009.96   | 0.931        | 0.993        | 1%   |
| LacCer d18:0/16:0 | 75.33         | 23.28        | 78.75         | 22.60      | 0.500        | 0.522        | 5%   |
| LacCer d18:1/18:0 | 109.00        | 71.30        | 95.69         | 32.07      | 0.242        | 0.260        | -12% |
| LacCer d18:1/20:0 | 39.60         | 25.97        | 42.52         | 17.22      | 0.532        | 0.162        | 7%   |
| LacCer d18:1/22:0 | 188.97        | 107.44       | 171.93        | 70.53      | 0.377        | 0.590        | -9%  |
| LacCer d18:1/24:1 | 686.51        | 239.04       | 623.51        | 232.14     | 0.231        | 0.210        | -9%  |
| LacCer d18:1/24:0 | 293.83        | 150.47       | 249.52        | 97.27      | 0.101        | 0.122        | -15% |
| LacCer d18:0/24:1 | 18.94         | 6.29         | 16.25         | 8.33       | 0.112        | <b>0.023</b> | -14% |
| Gb3 d18:1/16:0    | 1,475.01      | 341.95       | 1,407.10      | 356.44     | 0.383        | 0.349        | -5%  |
| Gb3 d18:1/18:0    | 178.08        | 54.45        | 155.69        | 52.31      | 0.060        | 0.053        | -13% |
| Gb3 d18:1/20:0    | 74.52         | 23.04        | 66.47         | 26.67      | 0.153        | 0.077        | -11% |
| Gb3 d18:1/22:0    | 233.66        | 73.99        | 204.72        | 74.21      | 0.080        | 0.087        | -12% |
| Gb3 d18:1/24:1    | 27.39         | 10.71        | 26.06         | 16.76      | 0.682        | 0.207        | -5%  |
| Gb3 d18:1/24:0    | 89.96         | 27.76        | 72.92         | 29.86      | <b>0.009</b> | <b>0.007</b> | -19% |
| GM3 d18:1/16:0    | 3,230.66      | 743.80       | 3,421.24      | 948.30     | 0.325        | 0.458        | 6%   |
| GM3 d18:0/16:0    | 656.38        | 157.53       | 734.77        | 207.16     | 0.064        | 0.097        | 12%  |
| GM3 d18:1/18:1    | 358.22        | 118.33       | 382.26        | 123.55     | 0.372        | 0.432        | 7%   |
| GM3 d18:1/18:0    | 1,298.21      | 345.54       | 1,501.44      | 435.82     | <b>0.025</b> | <b>0.023</b> | 16%  |
| GM3 d18:0/18:0    | 483.70        | 102.38       | 566.27        | 145.86     | <b>0.005</b> | <b>0.006</b> | 17%  |
| GM3 d18:1/20:1    | 178.66        | 66.49        | 199.74        | 66.68      | 0.155        | 0.099        | 12%  |
| GM3 d18:1/20:0    | 579.67        | 201.64       | 684.08        | 234.19     | <b>0.036</b> | <b>0.042</b> | 18%  |
| GM3 d18:0/20:0    | 150.55        | 51.11        | 197.87        | 75.95      | <b>0.002</b> | <b>0.003</b> | 31%  |
| GM3 d18:1/22:1    | 782.38        | 256.58       | 893.93        | 252.30     | 0.050        | <b>0.034</b> | 14%  |
| GM3 d18:1/22:0    | 1,697.25      | 591.60       | 1,925.75      | 646.05     | 0.101        | 0.067        | 13%  |
| GM3 d18:0/22:0    | 412.66        | 174.55       | 550.96        | 221.37     | <b>0.003</b> | <b>0.001</b> | 34%  |
| GM3 d18:1/24:1    | 2,341.85      | 777.60       | 2,482.17      | 774.44     | 0.414        | 0.406        | 6%   |
| GM3 d18:1/24:0    | 1,813.16      | 540.12       | 1,795.02      | 566.71     | 0.883        | 0.832        | -1%  |
| GM3 d18:0/24:0    | 422.36        | 111.48       | 503.59        | 144.03     | <b>0.007</b> | <b>0.012</b> | 19%  |
| FFA               | 10,341,328.54 | 848,045.43   | 10,866,932.97 | 911,963.04 | <b>0.009</b> | <b>0.008</b> | 5%   |
| SM                | 1,861,821.87  | 2,598,307.35 | 615,324.37    | 281,122.01 | <b>0.001</b> | <b>0.000</b> | -67% |
| Cer               | 7,624.58      | 2,632.94     | 8,589.76      | 3,789.19   | 0.199        | 0.138        | 13%  |
| GluCer            | 3,943.86      | 1,257.22     | 3,510.42      | 1,279.15   | 0.126        | 0.092        | -11% |
| LacCer            | 4,656.76      | 1,420.62     | 4,541.53      | 1,379.99   | 0.711        | 0.757        | -2%  |
| GM3               | 14,405.69     | 3,703.54     | 15,839.10     | 4,106.46   | 0.104        | 0.100        | 10%  |
| Gb3               | 2,078.62      | 483.12       | 1,932.95      | 479.09     | 0.173        | 0.112        | -7%  |
| SM/Cer            | 257.28        | 346.65       | 75.33         | 32.93      | <b>0.000</b> | <b>0.000</b> | -71% |

717

718

719

720 **Supplementary Table 4** GIR differences in individual lipid species

| Lipid          | GIR < 5.1 (n=42)                 |                    | GIR ≥ 5.1 (n=44)                 |                    | P value      |                    | Percentage changed in GIR |
|----------------|----------------------------------|--------------------|----------------------------------|--------------------|--------------|--------------------|---------------------------|
|                | Average lipid concentration (nM) | Standard deviation | Average lipid concentration (nM) | Standard deviation | t.test       | Man whitney u test |                           |
| FFA22:6        | 26,607.05                        | 9,332.87           | 29,150.38                        | 12,112.08          | 0.280        | 0.622              | 10%                       |
| FFA22:5        | 35,920.88                        | 5,979.61           | 34,057.17                        | 5,365.49           | 0.132        | 0.154              | -5%                       |
| FFA22:4        | 46,854.61                        | 5,184.60           | 44,875.12                        | 4,408.02           | 0.059        | 0.104              | -4%                       |
| FFA20:5        | 37,059.56                        | 5,921.87           | 38,699.97                        | 7,427.44           | 0.262        | 0.142              | 4%                        |
| FFA20:4        | 65,459.54                        | 25,719.95          | 77,761.77                        | 33,507.37          | 0.060        | 0.104              | 19%                       |
| FFA20:3        | 72,590.15                        | 7,563.17           | 71,680.63                        | 4,878.05           | 0.507        | 0.762              | -1%                       |
| FFA18:3        | 21,879.83                        | 4,642.97           | 19,572.84                        | 2,213.94           | <b>0.004</b> | <b>0.023</b>       | -11%                      |
| FFA18:2        | 825,883.82                       | 287,515.05         | 761,451.75                       | 216,593.93         | 0.242        | 0.407              | -8%                       |
| FFA18:1        | 382,384.30                       | 78,245.13          | 339,748.69                       | 59,301.88          | <b>0.005</b> | <b>0.007</b>       | -11%                      |
| FFA18:0        | 2,545,189.69                     | 172,275.66         | 2,398,760.76                     | 250,820.40         | <b>0.002</b> | <b>0.004</b>       | -6%                       |
| FFA16:1        | 1,000,727.24                     | 245,056.04         | 769,717.65                       | 250,768.36         | <b>0.000</b> | <b>0.000</b>       | -23%                      |
| FFA16:0        | 2,689,712.49                     | 204,045.72         | 2,625,052.78                     | 217,529.74         | 0.159        | 0.106              | -2%                       |
| FFA14:0        | 232,674.32                       | 19,646.13          | 227,209.14                       | 21,555.62          | 0.223        | 0.325              | -2%                       |
| FA13:0         | 1,365,213.91                     | 169,640.88         | 1,407,736.41                     | 181,208.14         | 0.265        | 0.131              | 3%                        |
| FA12:0         | 1,519,191.44                     | 201,698.34         | 1,614,912.05                     | 210,845.36         | <b>0.034</b> | <b>0.016</b>       | 6%                        |
| SM d18:1/16:1  | 25,301.54                        | 13,156.13          | 52,620.85                        | 71,195.78          | <b>0.017</b> | <b>0.002</b>       | 108%                      |
| SM d18:1/16:0  | 175,643.25                       | 91,966.50          | 514,030.24                       | 812,355.35         | <b>0.009</b> | <b>0.000</b>       | 193%                      |
| SM d18:0/16:0  | 19,142.55                        | 10,433.59          | 52,340.65                        | 85,042.84          | <b>0.014</b> | <b>0.000</b>       | 173%                      |
| SM d18:1/17:1  | 491.95                           | 303.25             | 1,422.02                         | 2,098.66           | <b>0.006</b> | <b>0.000</b>       | 189%                      |
| SM d18:1/17:0  | 3,208.37                         | 1,806.82           | 9,836.29                         | 15,034.51          | <b>0.006</b> | <b>0.000</b>       | 207%                      |
| SM d18:1/18:1  | 18,640.25                        | 9,808.52           | 43,836.62                        | 65,728.79          | <b>0.016</b> | <b>0.001</b>       | 135%                      |
| SM d18:1/18:0  | 40,892.78                        | 20,053.25          | 90,535.08                        | 135,225.95         | <b>0.021</b> | <b>0.002</b>       | 121%                      |
| SM d18:0/18:0  | 6,790.95                         | 4,093.27           | 10,526.87                        | 14,699.17          | 0.116        | 0.452              | 55%                       |
| SM d18:1/19:1  | 447.89                           | 234.09             | 1,460.18                         | 2,219.10           | <b>0.004</b> | <b>0.000</b>       | 226%                      |
| SM d18:1/19:0  | 1,787.55                         | 822.65             | 4,662.20                         | 6,747.23           | <b>0.007</b> | <b>0.000</b>       | 161%                      |
| SM d18:1/20:1  | 8,343.49                         | 4,449.21           | 24,634.38                        | 36,978.63          | <b>0.006</b> | <b>0.000</b>       | 195%                      |
| SM d18:1/20:0  | 25,222.21                        | 11,121.24          | 62,633.45                        | 95,752.40          | <b>0.014</b> | <b>0.000</b>       | 148%                      |
| SM d18:1/21:1  | 1,046.96                         | 466.41             | 2,833.69                         | 3,938.79           | <b>0.004</b> | <b>0.000</b>       | 171%                      |
| SM d18:1/21:0  | 5,055.41                         | 2,199.41           | 13,027.86                        | 19,640.68          | <b>0.011</b> | <b>0.000</b>       | 158%                      |
| SM d18:1/22:1  | 31,914.57                        | 14,523.51          | 88,831.88                        | 133,223.32         | <b>0.007</b> | <b>0.000</b>       | 178%                      |
| SM d18:1/22:0  | 52,701.82                        | 23,465.98          | 129,288.92                       | 189,096.71         | <b>0.011</b> | <b>0.000</b>       | 145%                      |
| SM d18:1/23:1  | 11,568.81                        | 4,957.16           | 35,011.67                        | 50,500.29          | <b>0.004</b> | <b>0.000</b>       | 203%                      |
| SM d18:1/23:0  | 18,495.56                        | 8,310.51           | 46,935.02                        | 65,107.29          | <b>0.006</b> | <b>0.000</b>       | 154%                      |
| SM d18:1/24:1  | 106,811.38                       | 40,160.09          | 263,648.05                       | 356,332.79         | <b>0.006</b> | <b>0.000</b>       | 147%                      |
| SM d18:1/24:0  | 44,159.97                        | 18,958.22          | 108,004.11                       | 149,031.73         | <b>0.007</b> | <b>0.000</b>       | 145%                      |
| SM d18:0/24:0  | 4,760.18                         | 2,080.05           | 10,957.67                        | 14,970.47          | <b>0.009</b> | <b>0.000</b>       | 130%                      |
| SM d18:1/25:1  | 2,455.32                         | 955.44             | 6,022.50                         | 7,390.92           | <b>0.003</b> | <b>0.000</b>       | 145%                      |
| SM d18:1/25:0  | 1,984.13                         | 790.49             | 5,076.28                         | 6,684.72           | <b>0.004</b> | <b>0.000</b>       | 156%                      |
| SM d18:0/25:0  | 1,065.26                         | 393.11             | 3,199.24                         | 4,379.92           | <b>0.002</b> | <b>0.000</b>       | 200%                      |
| SM d18:1/26:1  | 688.89                           | 294.16             | 1,769.72                         | 2,118.06           | <b>0.002</b> | <b>0.000</b>       | 157%                      |
| SM d18:1/26:0  | 331.54                           | 179.75             | 917.12                           | 955.55             | <b>0.000</b> | <b>0.000</b>       | 177%                      |
| SM d18:0/26:0  | 131.90                           | 63.94              | 420.75                           | 433.64             | <b>0.000</b> | <b>0.000</b>       | 219%                      |
| Cer d18:1/16:0 | 728.41                           | 354.42             | 728.69                           | 250.48             | 0.997        | 0.369              | 0%                        |
| Cer d18:1/18:0 | 411.52                           | 368.97             | 372.52                           | 216.29             | 0.549        | 0.876              | -9%                       |
| Cer d18:0/18:0 | 243.21                           | 242.38             | 259.16                           | 193.09             | 0.736        | 0.204              | 7%                        |
| Cer d18:1/20:0 | 363.41                           | 428.94             | 271.26                           | 163.99             | 0.188        | 0.442              | -25%                      |
| Cer d18:1/22:0 | 1,109.08                         | 461.70             | 952.66                           | 482.30             | 0.129        | <b>0.045</b>       | -14%                      |
| Cer d18:1/24:1 | 2,579.23                         | 1,670.39           | 1,871.32                         | 911.86             | <b>0.016</b> | <b>0.009</b>       | -27%                      |
| Cer d18:1/24:0 | 3,348.22                         | 1,577.30           | 2,789.03                         | 1,280.18           | 0.074        | <b>0.037</b>       | -17%                      |
| Cer d18:0/24:1 | 211.93                           | 188.27             | 212.47                           | 160.36             | 0.988        | 0.447              | 0%                        |

721

|                   |               |            |               |              |              |              |      |
|-------------------|---------------|------------|---------------|--------------|--------------|--------------|------|
| GluCer d18:1/16:0 | 743.11        | 288.65     | 769.57        | 264.47       | 0.658        | 0.557        | 4%   |
| GluCer d18:0/16:0 | 27.51         | 9.87       | 26.66         | 8.26         | 0.666        | 0.853        | -3%  |
| GluCer d18:1/18:0 | 98.66         | 35.95      | 107.11        | 42.88        | 0.326        | 0.471        | 9%   |
| GluCer d18:0/18:0 | 7.15          | 3.44       | 7.91          | 3.75         | 0.334        | 0.548        | 11%  |
| GluCer d18:1/20:0 | 79.67         | 29.19      | 97.02         | 31.86        | <b>0.010</b> | <b>0.012</b> | 22%  |
| GluCer d18:0/20:0 | 6.16          | 2.88       | 6.77          | 3.86         | 0.408        | 0.598        | 10%  |
| GluCer d18:1/22:0 | 673.39        | 265.07     | 782.15        | 306.00       | 0.082        | 0.079        | 16%  |
| GluCer d18:0/22:0 | 17.83         | 8.13       | 18.71         | 7.42         | 0.603        | 0.500        | 5%   |
| GluCer d18:1/24:1 | 911.17        | 286.78     | 1,004.74      | 306.84       | 0.148        | 0.135        | 10%  |
| GluCer d18:0/24:1 | 876.34        | 374.31     | 995.37        | 407.05       | 0.162        | 0.128        | 14%  |
| GluCer d18:1/24:0 | 25.54         | 10.59      | 28.49         | 11.46        | 0.219        | 0.145        | 12%  |
| GluCer d18:0/24:0 | 20.89         | 8.47       | 22.80         | 10.31        | 0.350        | 0.397        | 9%   |
| LacCer d18:1/16:0 | 3,241.04      | 973.12     | 3,270.18      | 986.25       | 0.891        | 1.000        | 1%   |
| LacCer d18:0/16:0 | 78.43         | 21.02      | 76.41         | 24.58        | 0.683        | 0.487        | -3%  |
| LacCer d18:1/18:0 | 100.36        | 33.07      | 101.51        | 64.52        | 0.918        | 0.560        | 1%   |
| LacCer d18:1/20:0 | 42.51         | 17.91      | 40.27         | 23.77        | 0.624        | 0.280        | -5%  |
| LacCer d18:1/22:0 | 171.49        | 62.64      | 185.52        | 105.15       | 0.457        | 0.966        | 8%   |
| LacCer d18:1/24:1 | 625.25        | 231.64     | 670.53        | 239.75       | 0.376        | 0.402        | 7%   |
| LacCer d18:1/24:0 | 249.44        | 90.21      | 283.84        | 145.54       | 0.194        | 0.427        | 14%  |
| LacCer d18:0/24:1 | 16.56         | 8.50       | 18.02         | 6.79         | 0.382        | 0.175        | 9%   |
| Gb3 d18:1/16:0    | 1,413.50      | 368.06     | 1,453.47      | 335.65       | 0.600        | 0.233        | 3%   |
| Gb3 d18:1/18:0    | 155.48        | 52.51      | 173.19        | 54.54        | 0.129        | 0.134        | 11%  |
| Gb3 d18:1/20:0    | 66.58         | 26.62      | 72.58         | 24.25        | 0.278        | 0.251        | 9%   |
| Gb3 d18:1/22:0    | 207.11        | 75.27      | 224.80        | 74.66        | 0.277        | 0.312        | 9%   |
| Gb3 d18:1/24:1    | 28.47         | 16.65      | 24.78         | 12.29        | 0.244        | 0.557        | -13% |
| Gb3 d18:1/24:0    | 70.76         | 27.77      | 88.15         | 30.02        | <b>0.007</b> | <b>0.002</b> | 25%  |
| GM3 d18:1/16:0    | 3,465.41      | 967.06     | 3,231.81      | 767.81       | 0.217        | 0.333        | -7%  |
| GM3 d18:0/16:0    | 744.81        | 204.69     | 664.61        | 172.39       | 0.052        | <b>0.049</b> | -11% |
| GM3 d18:1/18:1    | 386.54        | 116.55     | 359.59        | 125.75       | 0.306        | 0.213        | -7%  |
| GM3 d18:1/18:0    | 1,531.53      | 398.74     | 1,315.67      | 402.21       | <b>0.014</b> | <b>0.004</b> | -14% |
| GM3 d18:0/18:0    | 577.43        | 144.19     | 491.82        | 114.25       | <b>0.003</b> | <b>0.003</b> | -15% |
| GM3 d18:1/20:1    | 200.15        | 64.44      | 183.06        | 69.09        | 0.240        | 0.126        | -9%  |
| GM3 d18:1/20:0    | 704.50        | 243.43     | 583.90        | 194.15       | <b>0.013</b> | <b>0.018</b> | -17% |
| GM3 d18:0/20:0    | 205.34        | 79.19      | 154.17        | 51.27        | <b>0.001</b> | <b>0.001</b> | -25% |
| GM3 d18:1/22:1    | 888.84        | 260.81     | 812.60        | 253.38       | 0.173        | 0.152        | -9%  |
| GM3 d18:1/22:0    | 1,980.84      | 679.39     | 1,696.60      | 555.08       | <b>0.036</b> | <b>0.024</b> | -14% |
| GM3 d18:0/22:0    | 574.80        | 225.67     | 421.35        | 174.14       | <b>0.001</b> | <b>0.000</b> | -27% |
| GM3 d18:1/24:1    | 2,471.21      | 795.58     | 2,384.20      | 759.93       | 0.605        | 0.691        | -4%  |
| GM3 d18:1/24:0    | 1,837.56      | 583.45     | 1,768.44      | 527.24       | 0.566        | 0.500        | -4%  |
| GM3 d18:0/24:0    | 522.42        | 137.40     | 422.84        | 119.75       | <b>0.001</b> | <b>0.001</b> | -19% |
| FFA               | 10,867,348.82 | 882,985.02 | 10,460,387.14 | 918,832.05   | <b>0.039</b> | 0.052        | -4%  |
| SM                | 609,084.46    | 270,992.42 | 1,584,483.26  | 2,339,287.65 | <b>0.009</b> | <b>0.000</b> | 160% |
| Cer               | 8,995.02      | 3,992.95   | 7,457.11      | 2,531.94     | <b>0.035</b> | <b>0.017</b> | -17% |
| GluCer            | 3,487.42      | 1,227.31   | 3,867.30      | 1,317.24     | 0.171        | 0.126        | 11%  |
| LacCer            | 4,525.08      | 1,327.02   | 4,646.27      | 1,458.56     | 0.688        | 0.863        | 3%   |
| GM3               | 16,091.36     | 4,163.69   | 14,490.66     | 3,701.17     | 0.063        | <b>0.048</b> | -10% |
| Gb3               | 1,941.90      | 493.99     | 2,036.97      | 473.61       | 0.365        | 0.120        | 5%   |
| SM/Cer            | 71.68         | 32.29      | 219.40        | 312.15       | <b>0.003</b> | <b>0.000</b> | 206% |

722

723

724

725

726 **Supplementary Table 5** FPIR differences in individual lipid species

| Sphingolipid   | FPIR<350 (n=32)                  |                    | FPIR>350 (n=54)                  |                    | P value      |                    | Percentage changed in FPIR |
|----------------|----------------------------------|--------------------|----------------------------------|--------------------|--------------|--------------------|----------------------------|
|                | Average lipid concentration (nM) | Standard deviation | Average lipid concentration (nM) | Standard deviation | t.test       | Man whitney u test |                            |
| FFA22:6        | 30933.36                         | 10802.90           | 26115.65                         | 10581.45           | 0.764        | <b>0.009</b>       | -16%                       |
| FFA22:5        | 37292.94                         | 4346.40            | 33589.23                         | 6014.57            | 0.151        | <b>0.000</b>       | -10%                       |
| FFA22:4        | 46413.66                         | 4107.59            | 45503.00                         | 5288.10            | 0.305        | 0.201              | -2%                        |
| FFA20:5        | 38365.22                         | 7441.80            | 37622.47                         | 6354.22            | 0.737        | 0.636              | -2%                        |
| FFA20:4        | 72213.60                         | 24411.97           | 71481.17                         | 33693.18           | 0.106        | 0.093              | -1%                        |
| FFA20:3        | 73346.37                         | 5041.58            | 71400.93                         | 6898.52            | 0.109        | 0.124              | -3%                        |
| FFA18:3        | 21277.51                         | 3718.62            | 20356.99                         | 3794.93            | 0.745        | 0.088              | -4%                        |
| FFA18:2        | 897119.34                        | 235720.26          | 731169.97                        | 246480.70          | 0.806        | <b>0.000</b>       | -18%                       |
| FFA18:1        | 397139.23                        | 63927.86           | 338900.51                        | 68191.46           | 0.677        | <b>0.000</b>       | -15%                       |
| FFA18:0        | 2539078.10                       | 174963.97          | 2429498.92                       | 245429.58          | <b>0.005</b> | <b>0.037</b>       | -4%                        |
| FFA16:1        | 907304.82                        | 261234.17          | 867858.64                        | 280367.87          | 0.471        | 0.348              | -4%                        |
| FFA16:0        | 2735074.86                       | 189190.91          | 2610145.40                       | 213170.04          | 0.750        | <b>0.001</b>       | -5%                        |
| FFA14:0        | 231556.10                        | 18307.13           | 228883.85                        | 22111.71           | 0.124        | 0.761              | -1%                        |
| FA13:0         | 1392401.95                       | 127368.27          | 1383750.44                       | 200297.49          | <b>0.013</b> | 0.900              | -1%                        |
| FA12:0         | 1545982.45                       | 151439.78          | 1581309.86                       | 239513.03          | <b>0.022</b> | 0.163              | 2%                         |
| SM d18:1/16:1  | 28592.38                         | 14527.93           | 45611.58                         | 65693.88           | <b>0.019</b> | 0.567              | 60%                        |
| SM d18:1/16:0  | 220911.63                        | 140418.89          | 424540.27                        | 749081.64          | <b>0.017</b> | 0.344              | 92%                        |
| SM d18:0/16:0  | 22923.05                         | 12621.92           | 43952.56                         | 78344.84           | <b>0.017</b> | 0.475              | 92%                        |
| SM d18:1/17:1  | 609.42                           | 405.39             | 1180.17                          | 1943.09            | <b>0.012</b> | 0.235              | 94%                        |
| SM d18:1/17:0  | 4199.35                          | 2892.12            | 8021.65                          | 13902.99           | <b>0.017</b> | 0.304              | 91%                        |
| SM d18:1/18:1  | 21177.75                         | 10539.15           | 37666.93                         | 60571.47           | <b>0.011</b> | 0.555              | 78%                        |
| SM d18:1/18:0  | 46927.91                         | 21311.30           | 77765.70                         | 124578.97          | <b>0.016</b> | 0.971              | 66%                        |
| SM d18:0/18:0  | 7123.20                          | 3194.99            | 9638.14                          | 13621.68           | <b>0.023</b> | 0.284              | 35%                        |
| SM d18:1/19:1  | 561.22                           | 403.34             | 1205.56                          | 2049.53            | <b>0.012</b> | <b>0.043</b>       | 115%                       |
| SM d18:1/19:0  | 2215.56                          | 1298.20            | 3876.22                          | 6227.21            | <b>0.018</b> | 0.491              | 75%                        |
| SM d18:1/20:1  | 10106.24                         | 6944.83            | 20572.95                         | 34096.73           | <b>0.012</b> | 0.051              | 104%                       |
| SM d18:1/20:0  | 29256.41                         | 15003.03           | 53314.81                         | 88037.81           | <b>0.017</b> | 0.280              | 82%                        |
| SM d18:1/21:1  | 1249.56                          | 761.24             | 2382.75                          | 3636.45            | <b>0.013</b> | 0.093              | 91%                        |
| SM d18:1/21:0  | 6145.86                          | 3652.73            | 10905.28                         | 18058.02           | <b>0.026</b> | 0.296              | 77%                        |
| SM d18:1/22:1  | 38397.92                         | 25186.68           | 74449.64                         | 122525.63          | <b>0.024</b> | <b>0.035</b>       | 94%                        |
| SM d18:1/22:0  | 61899.83                         | 35014.45           | 109655.45                        | 173877.17          | <b>0.029</b> | 0.136              | 77%                        |
| SM d18:1/23:1  | 14967.10                         | 11338.97           | 28656.60                         | 46526.03           | <b>0.025</b> | 0.062              | 91%                        |
| SM d18:1/23:0  | 22748.17                         | 14122.38           | 39148.39                         | 60015.67           | <b>0.031</b> | 0.195              | 72%                        |
| SM d18:1/24:1  | 124436.27                        | 64619.26           | 224159.84                        | 328669.90          | <b>0.023</b> | 0.064              | 80%                        |
| SM d18:1/24:0  | 52357.79                         | 29191.84           | 91323.15                         | 137391.44          | <b>0.035</b> | 0.120              | 74%                        |
| SM d18:0/24:0  | 5631.16                          | 3078.11            | 9293.85                          | 13788.43           | <b>0.045</b> | 0.218              | 65%                        |
| SM d18:1/25:1  | 2932.18                          | 1577.39            | 5079.33                          | 6854.28            | <b>0.016</b> | 0.074              | 73%                        |
| SM d18:1/25:0  | 2412.81                          | 1357.12            | 4249.62                          | 6185.30            | <b>0.019</b> | 0.110              | 76%                        |
| SM d18:0/25:0  | 1406.07                          | 927.20             | 2602.09                          | 4060.15            | <b>0.023</b> | 0.068              | 85%                        |
| SM d18:1/26:1  | 848.64                           | 474.83             | 1474.90                          | 1974.77            | <b>0.025</b> | 0.095              | 74%                        |
| SM d18:1/26:0  | 450.29                           | 362.28             | 738.31                           | 892.52             | <b>0.037</b> | 0.054              | 64%                        |
| SM d18:0/26:0  | 196.95                           | 173.68             | 328.71                           | 406.61             | <b>0.041</b> | <b>0.046</b>       | 67%                        |
| Cer d18:1/16:0 | 770.11                           | 318.55             | 703.93                           | 295.06             | 0.365        | 0.442              | -9%                        |
| Cer d18:1/18:0 | 402.53                           | 372.72             | 385.07                           | 250.03             | 0.728        | 1.000              | -4%                        |
| Cer d18:0/18:0 | 225.15                           | 189.60             | 266.91                           | 232.62             | 0.505        | 0.348              | 19%                        |
| Cer d18:1/20:0 | 376.14                           | 475.69             | 280.78                           | 178.31             | 0.068        | 0.543              | -25%                       |
| Cer d18:1/22:0 | 1228.05                          | 575.67             | 911.13                           | 362.82             | <b>0.024</b> | <b>0.006</b>       | -26%                       |
| Cer d18:1/24:1 | 2712.80                          | 1758.19            | 1923.27                          | 995.91             | 0.051        | <b>0.007</b>       | -29%                       |
| Cer d18:1/24:0 | 3687.60                          | 1795.29            | 2691.46                          | 1058.12            | <b>0.043</b> | <b>0.002</b>       | -27%                       |
| Cer d18:0/24:1 | 224.58                           | 194.17             | 204.87                           | 161.51             | 0.239        | 0.782              | -9%                        |

|                   |             |           |             |            |              |              |      |
|-------------------|-------------|-----------|-------------|------------|--------------|--------------|------|
| GluCer d18:1/16:0 | 834.39      | 295.06    | 710.58      | 254.47     | 0.113        | <b>0.033</b> | -15% |
| GluCer d18:0/16:0 | 27.16       | 9.33      | 27.02       | 8.95       | 0.718        | 0.865        | 0%   |
| GluCer d18:1/18:0 | 108.75      | 35.64     | 99.57       | 41.78      | 0.875        | 0.109        | -8%  |
| GluCer d18:0/18:0 | 7.27        | 3.66      | 7.70        | 3.59       | 0.334        | 0.506        | 6%   |
| GluCer d18:1/20:0 | 92.66       | 33.03     | 86.11       | 30.83      | 0.612        | 0.353        | -7%  |
| GluCer d18:0/20:0 | 6.42        | 3.19      | 6.50        | 3.56       | 0.793        | 0.964        | 1%   |
| GluCer d18:1/22:0 | 762.16      | 302.54    | 709.41      | 283.78     | 0.350        | 0.427        | -7%  |
| GluCer d18:0/22:0 | 17.55       | 7.97      | 18.71       | 7.65       | 0.989        | 0.458        | 7%   |
| GluCer d18:1/24:1 | 983.05      | 312.80    | 944.82      | 292.86     | 0.718        | 0.491        | -4%  |
| GluCer d18:0/24:1 | 1003.47     | 420.78    | 897.99      | 375.21     | 0.178        | 0.272        | -11% |
| GluCer d18:1/24:0 | 27.12       | 10.58     | 27.01       | 11.46      | 0.914        | 0.872        | 0%   |
| GluCer d18:0/24:0 | 23.09       | 8.77      | 21.14       | 9.83       | 0.915        | 0.240        | -8%  |
| LacCer d18:1/16:0 | 3512.77     | 975.36    | 3103.76     | 949.85     | 0.796        | <b>0.047</b> | -12% |
| LacCer d18:0/16:0 | 82.38       | 20.05     | 74.44       | 23.97      | 0.342        | 0.053        | -10% |
| LacCer d18:1/18:0 | 113.33      | 74.54     | 93.61       | 28.74      | <b>0.044</b> | 0.195        | -17% |
| LacCer d18:1/20:0 | 51.35       | 27.61     | 35.45       | 12.91      | <b>0.003</b> | <b>0.003</b> | -31% |
| LacCer d18:1/22:0 | 219.30      | 118.64    | 154.59      | 47.60      | <b>0.000</b> | <b>0.008</b> | -30% |
| LacCer d18:1/24:1 | 722.00      | 282.60    | 604.81      | 192.50     | <b>0.010</b> | 0.080        | -16% |
| LacCer d18:1/24:0 | 321.65      | 165.22    | 234.67      | 71.61      | <b>0.000</b> | <b>0.007</b> | -27% |
| LacCer d18:0/24:1 | 18.57       | 8.54      | 16.56       | 7.07       | 0.187        | 0.255        | -11% |
| Gb3 d18:1/16:0    | 1507.19     | 393.94    | 1390.55     | 317.68     | 0.489        | 0.057        | -8%  |
| Gb3 d18:1/18:0    | 169.87      | 61.39     | 161.38      | 49.42      | 0.290        | 0.721        | -5%  |
| Gb3 d18:1/20:0    | 70.80       | 27.65     | 68.97       | 24.33      | 0.485        | 0.796        | -3%  |
| Gb3 d18:1/22:0    | 221.33      | 74.61     | 213.10      | 75.83      | 0.860        | 0.543        | -4%  |
| Gb3 d18:1/24:1    | 27.09       | 16.33     | 26.28       | 13.64      | 0.191        | 0.886        | -3%  |
| Gb3 d18:1/24:0    | 79.64       | 35.20     | 79.66       | 26.94      | 0.127        | 0.837        | 0%   |
| GM3 d18:1/16:0    | 3513.20     | 950.06    | 3246.75     | 817.94     | 0.349        | 0.070        | -8%  |
| GM3 d18:0/16:0    | 762.83      | 190.85    | 668.78      | 185.67     | 0.568        | <b>0.013</b> | -12% |
| GM3 d18:1/18:1    | 396.85      | 125.27    | 358.48      | 117.88     | 0.296        | 0.071        | -10% |
| GM3 d18:1/18:0    | 1535.46     | 415.03    | 1353.32     | 399.76     | 0.473        | <b>0.022</b> | -12% |
| GM3 d18:0/18:0    | 572.90      | 151.58    | 510.36      | 121.33     | 0.112        | 0.073        | -11% |
| GM3 d18:1/20:1    | 194.77      | 55.15     | 189.41      | 73.57      | 0.312        | 0.353        | -3%  |
| GM3 d18:1/20:0    | 710.84      | 259.53    | 602.48      | 196.14     | 0.065        | 0.076        | -15% |
| GM3 d18:0/20:0    | 204.08      | 79.28     | 164.39      | 61.42      | <b>0.034</b> | <b>0.014</b> | -19% |
| GM3 d18:1/22:1    | 906.98      | 277.97    | 815.97      | 242.35     | 0.591        | 0.063        | -10% |
| GM3 d18:1/22:0    | 2038.86     | 729.71    | 1714.86     | 537.18     | 0.113        | <b>0.041</b> | -16% |
| GM3 d18:0/22:0    | 568.51      | 238.55    | 453.49      | 187.74     | 0.341        | <b>0.011</b> | -20% |
| GM3 d18:1/24:1    | 2582.12     | 800.58    | 2334.58     | 750.43     | 0.509        | 0.158        | -10% |
| GM3 d18:1/24:0    | 1967.27     | 574.02    | 1704.37     | 521.42     | 0.508        | <b>0.024</b> | -13% |
| GM3 d18:0/24:0    | 530.96      | 148.20    | 436.23      | 118.36     | 0.223        | <b>0.002</b> | -18% |
| FFA               | 10965635.23 | 805437.08 | 10477506.62 | 940992.26  | 0.305        | <b>0.013</b> | -4%  |
| SM                | 730684.69   | 410181.86 | 1331794.46  | 2155670.38 | <b>0.019</b> | 0.198        | 82%  |
| Cer               | 9626.95     | 4404.06   | 7367.43     | 2283.34    | <b>0.030</b> | <b>0.003</b> | -23% |
| GluCer            | 3893.08     | 1366.10   | 3556.56     | 1223.52    | 0.142        | 0.245        | -9%  |
| LacCer            | 5041.34     | 1538.19   | 4317.89     | 1229.60    | 0.101        | <b>0.029</b> | -14% |
| GM3               | 16485.62    | 4372.49   | 14553.45    | 3600.83    | 0.154        | <b>0.039</b> | -12% |
| Gb3               | 2075.91     | 549.72    | 1939.95     | 436.65     | 0.463        | 0.153        | -7%  |
| SM/Cer            | 78.81       | 35.76     | 187.82      | 288.88     | <b>0.005</b> | <b>0.002</b> | 138% |

728

729

730

731 **Supplementary Table 6** Pearson's relationship between lipids and clinical characteristics adjusted  
732 by age, sex, BMI, TG, TC, HDLc, LDLc, ALT and AST.



| lipid          | GIR            |              | GIR(age, sex) |              | GIR(age,sex,LDLc,HDLc,TC,TG) |              | GIR(age,sex,LDLc,HDLc,TC,TG,BMI) |              | GIR(age,sex,LDLc,HDLc,TC,TG,BMI,AS T,ALT) |              |
|----------------|----------------|--------------|---------------|--------------|------------------------------|--------------|----------------------------------|--------------|-------------------------------------------|--------------|
|                | r              | p            | adjusted r    | p            | adjusted r                   | p            | adjusted r                       | p            | adjusted r                                | p            |
| FFA22:6        | 0.111          | 0.308        | <b>0.140</b>  | <b>0.034</b> | <b>0.238</b>                 | <b>0.034</b> | <b>0.274</b>                     | <b>0.015</b> | <b>0.266</b>                              | <b>0.019</b> |
| FFA22:5        | -0.138         | 0.204        | -0.079        | 0.103        | 0.184                        | 0.103        | <b>0.259</b>                     | <b>0.021</b> | <b>0.247</b>                              | <b>0.031</b> |
| FFA22:4        | <b>-.242*</b>  | <b>0.025</b> | -0.202        | 0.871        | -0.019                       | 0.871        | 0.118                            | 0.300        | 0.078                                     | 0.501        |
| FFA20:5        | 0.131          | 0.230        | 0.126         | 0.292        | 0.119                        | 0.292        | <b>0.270</b>                     | <b>0.016</b> | <b>0.245</b>                              | <b>0.031</b> |
| FFA20:4        | <b>.304**</b>  | <b>0.004</b> | <b>0.304</b>  | <b>0.001</b> | <b>0.360</b>                 | <b>0.001</b> | <b>0.455</b>                     | <b>0.000</b> | <b>0.428</b>                              | <b>0.000</b> |
| FFA20:3        | -0.066         | 0.544        | -0.024        | 0.524        | 0.072                        | 0.524        | 0.162                            | 0.154        | 0.138                                     | 0.230        |
| FFA18:3        | <b>-.287**</b> | <b>0.007</b> | -0.242        | 0.717        | -0.041                       | 0.717        | 0.062                            | 0.588        | 0.045                                     | 0.695        |
| FFA18:2        | -0.186         | 0.087        | -0.123        | 0.544        | 0.069                        | 0.544        | 0.190                            | 0.093        | 0.164                                     | 0.154        |
| FFA18:1        | <b>-.384**</b> | <b>0.000</b> | -0.340        | 0.370        | -0.102                       | 0.370        | 0.008                            | 0.942        | 0.002                                     | 0.987        |
| FFA18:0        | <b>-.498**</b> | <b>0.000</b> | <b>-0.495</b> | <b>0.009</b> | <b>-0.291</b>                | <b>0.009</b> | -0.176                           | 0.120        | -0.185                                    | 0.108        |
| FFA16:1        | <b>-.555**</b> | <b>0.000</b> | <b>-0.548</b> | <b>0.000</b> | <b>-0.396</b>                | <b>0.000</b> | -0.214                           | 0.058        | <b>-0.243</b>                             | <b>0.033</b> |
| FFA16:0        | <b>-.294**</b> | <b>0.006</b> | -0.283        | 0.506        | -0.076                       | 0.506        | 0.028                            | 0.807        | 0.007                                     | 0.952        |
| FFA14:0        | -0.207         | 0.056        | -0.182        | 0.656        | -0.051                       | 0.656        | 0.050                            | 0.660        | 0.019                                     | 0.869        |
| FA13:0         | 0.151          | 0.166        | 0.172         | 0.294        | 0.119                        | 0.294        | 0.093                            | 0.414        | 0.077                                     | 0.504        |
| FA12:0         | <b>.239*</b>   | <b>0.027</b> | 0.250         | 0.270        | 0.125                        | 0.270        | 0.066                            | 0.564        | 0.037                                     | 0.748        |
| SM d18:1/16:1  | <b>.441**</b>  | <b>0.000</b> | <b>0.420</b>  | <b>0.000</b> | <b>0.403</b>                 | <b>0.000</b> | <b>0.313</b>                     | <b>0.005</b> | <b>0.317</b>                              | <b>0.005</b> |
| SM d18:1/16:0  | <b>.468**</b>  | <b>0.000</b> | <b>0.449</b>  | <b>0.000</b> | <b>0.422</b>                 | <b>0.000</b> | <b>0.319</b>                     | <b>0.004</b> | <b>0.323</b>                              | <b>0.004</b> |
| SM d18:0/16:0  | <b>.442**</b>  | <b>0.000</b> | <b>0.422</b>  | <b>0.000</b> | <b>0.405</b>                 | <b>0.000</b> | <b>0.304</b>                     | <b>0.007</b> | <b>0.308</b>                              | <b>0.006</b> |
| SM d18:1/17:1  | <b>.483**</b>  | <b>0.000</b> | <b>0.466</b>  | <b>0.000</b> | <b>0.430</b>                 | <b>0.000</b> | <b>0.325</b>                     | <b>0.003</b> | <b>0.330</b>                              | <b>0.003</b> |
| SM d18:1/17:0  | <b>.482**</b>  | <b>0.000</b> | <b>0.466</b>  | <b>0.000</b> | <b>0.432</b>                 | <b>0.000</b> | <b>0.322</b>                     | <b>0.004</b> | <b>0.328</b>                              | <b>0.004</b> |
| SM d18:1/18:1  | <b>.435**</b>  | <b>0.000</b> | <b>0.416</b>  | <b>0.000</b> | <b>0.400</b>                 | <b>0.000</b> | <b>0.293</b>                     | <b>0.009</b> | <b>0.298</b>                              | <b>0.008</b> |
| SM d18:1/18:0  | <b>.424**</b>  | <b>0.000</b> | <b>0.405</b>  | <b>0.000</b> | <b>0.392</b>                 | <b>0.000</b> | <b>0.287</b>                     | <b>0.010</b> | <b>0.294</b>                              | <b>0.009</b> |
| SM d18:0/18:0  | <b>.323**</b>  | <b>0.002</b> | <b>0.300</b>  | <b>0.003</b> | <b>0.328</b>                 | <b>0.003</b> | <b>0.239</b>                     | <b>0.034</b> | <b>0.250</b>                              | <b>0.028</b> |
| SM d18:1/19:1  | <b>.495**</b>  | <b>0.000</b> | <b>0.477</b>  | <b>0.000</b> | <b>0.439</b>                 | <b>0.000</b> | <b>0.330</b>                     | <b>0.003</b> | <b>0.333</b>                              | <b>0.003</b> |
| SM d18:1/19:0  | <b>.469**</b>  | <b>0.000</b> | <b>0.456</b>  | <b>0.000</b> | <b>0.424</b>                 | <b>0.000</b> | <b>0.317</b>                     | <b>0.004</b> | <b>0.325</b>                              | <b>0.004</b> |
| SM d18:1/20:1  | <b>.484**</b>  | <b>0.000</b> | <b>0.466</b>  | <b>0.000</b> | <b>0.432</b>                 | <b>0.000</b> | <b>0.326</b>                     | <b>0.003</b> | <b>0.330</b>                              | <b>0.003</b> |
| SM d18:1/20:0  | <b>.444**</b>  | <b>0.000</b> | <b>0.428</b>  | <b>0.000</b> | <b>0.410</b>                 | <b>0.000</b> | <b>0.305</b>                     | <b>0.006</b> | <b>0.311</b>                              | <b>0.006</b> |
| SM d18:1/21:1  | <b>.494**</b>  | <b>0.000</b> | <b>0.477</b>  | <b>0.000</b> | <b>0.449</b>                 | <b>0.000</b> | <b>0.345</b>                     | <b>0.002</b> | <b>0.347</b>                              | <b>0.002</b> |
| SM d18:1/21:0  | <b>.463**</b>  | <b>0.000</b> | <b>0.449</b>  | <b>0.000</b> | <b>0.427</b>                 | <b>0.000</b> | <b>0.328</b>                     | <b>0.003</b> | <b>0.335</b>                              | <b>0.003</b> |
| SM d18:1/22:1  | <b>.479**</b>  | <b>0.000</b> | <b>0.461</b>  | <b>0.000</b> | <b>0.431</b>                 | <b>0.000</b> | <b>0.333</b>                     | <b>0.003</b> | <b>0.337</b>                              | <b>0.003</b> |
| SM d18:1/22:0  | <b>.463**</b>  | <b>0.000</b> | <b>0.445</b>  | <b>0.000</b> | <b>0.424</b>                 | <b>0.000</b> | <b>0.329</b>                     | <b>0.003</b> | <b>0.332</b>                              | <b>0.003</b> |
| SM d18:1/23:1  | <b>.512**</b>  | <b>0.000</b> | <b>0.495</b>  | <b>0.000</b> | <b>0.462</b>                 | <b>0.000</b> | <b>0.359</b>                     | <b>0.001</b> | <b>0.363</b>                              | <b>0.001</b> |
| SM d18:1/23:0  | <b>.492**</b>  | <b>0.000</b> | <b>0.477</b>  | <b>0.000</b> | <b>0.450</b>                 | <b>0.000</b> | <b>0.355</b>                     | <b>0.001</b> | <b>0.359</b>                              | <b>0.001</b> |
| SM d18:1/24:1  | <b>.473**</b>  | <b>0.000</b> | <b>0.458</b>  | <b>0.000</b> | <b>0.438</b>                 | <b>0.000</b> | <b>0.338</b>                     | <b>0.002</b> | <b>0.339</b>                              | <b>0.003</b> |
| SM d18:1/24:0  | <b>.474**</b>  | <b>0.000</b> | <b>0.458</b>  | <b>0.000</b> | <b>0.431</b>                 | <b>0.000</b> | <b>0.340</b>                     | <b>0.002</b> | <b>0.345</b>                              | <b>0.002</b> |
| SM d18:0/24:0  | <b>.464**</b>  | <b>0.000</b> | <b>0.449</b>  | <b>0.000</b> | <b>0.428</b>                 | <b>0.000</b> | <b>0.340</b>                     | <b>0.002</b> | <b>0.346</b>                              | <b>0.002</b> |
| SM d18:1/25:1  | <b>.507**</b>  | <b>0.000</b> | <b>0.495</b>  | <b>0.000</b> | <b>0.446</b>                 | <b>0.000</b> | <b>0.343</b>                     | <b>0.002</b> | <b>0.351</b>                              | <b>0.002</b> |
| SM d18:1/25:0  | <b>.506**</b>  | <b>0.000</b> | <b>0.491</b>  | <b>0.000</b> | <b>0.447</b>                 | <b>0.000</b> | <b>0.343</b>                     | <b>0.002</b> | <b>0.349</b>                              | <b>0.002</b> |
| SM d18:0/25:0  | <b>.519**</b>  | <b>0.000</b> | <b>0.503</b>  | <b>0.000</b> | <b>0.460</b>                 | <b>0.000</b> | <b>0.353</b>                     | <b>0.001</b> | <b>0.354</b>                              | <b>0.002</b> |
| SM d18:1/26:1  | <b>.514**</b>  | <b>0.000</b> | <b>0.502</b>  | <b>0.000</b> | <b>0.464</b>                 | <b>0.000</b> | <b>0.368</b>                     | <b>0.001</b> | <b>0.368</b>                              | <b>0.001</b> |
| SM d18:1/26:0  | <b>.587**</b>  | <b>0.000</b> | <b>0.571</b>  | <b>0.000</b> | <b>0.507</b>                 | <b>0.000</b> | <b>0.431</b>                     | <b>0.000</b> | <b>0.429</b>                              | <b>0.000</b> |
| SM d18:0/26:0  | <b>.642**</b>  | <b>0.000</b> | <b>0.628</b>  | <b>0.000</b> | <b>0.552</b>                 | <b>0.000</b> | <b>0.463</b>                     | <b>0.000</b> | <b>0.463</b>                              | <b>0.000</b> |
| Cer d18:1/16:0 | 0.041          | 0.707        | 0.043         | 0.996        | -0.001                       | 0.996        | 0.004                            | 0.972        | -0.001                                    | 0.994        |
| Cer d18:1/18:0 | -0.062         | 0.571        | -0.082        | 0.411        | -0.093                       | 0.411        | 0.111                            | 0.331        | 0.073                                     | 0.526        |
| Cer d18:0/18:0 | 0.016          | 0.886        | 0.008         | 0.735        | 0.038                        | 0.735        | 0.028                            | 0.809        | 0.024                                     | 0.837        |
| Cer d18:1/20:0 | -0.145         | 0.184        | -0.147        | 0.653        | -0.051                       | 0.653        | 0.141                            | 0.216        | 0.128                                     | 0.269        |
| Cer d18:1/22:0 | -0.195         | 0.071        | -0.194        | 0.998        | 0.000                        | 0.998        | -0.033                           | 0.771        | -0.022                                    | 0.853        |
| Cer d18:1/24:1 | <b>-.263*</b>  | <b>0.014</b> | -0.247        | 0.370        | -0.102                       | 0.370        | 0.021                            | 0.853        | 0.003                                     | 0.982        |
| Cer d18:1/24:0 | -0.186         | 0.087        | -0.150        | 0.614        | 0.057                        | 0.614        | -0.005                           | 0.967        | 0.018                                     | 0.875        |
| Cer d18:0/24:1 | 0.028          | 0.796        | 0.034         | 0.863        | 0.020                        | 0.863        | 0.086                            | 0.450        | 0.065                                     | 0.576        |

|                   |                |              |               |              |               |              |               |              |               |              |
|-------------------|----------------|--------------|---------------|--------------|---------------|--------------|---------------|--------------|---------------|--------------|
| GluCer d18:1/16:0 | 0.056          | 0.608        | 0.030         | 0.126        | 0.172         | 0.126        | 0.121         | 0.287        | 0.145         | 0.209        |
| GluCer d18:0/16:0 | 0.009          | 0.936        | -0.005        | 0.404        | 0.095         | 0.404        | 0.113         | 0.322        | 0.112         | 0.332        |
| GluCer d18:1/18:0 | 0.095          | 0.384        | 0.087         | 0.164        | 0.157         | 0.164        | 0.005         | 0.967        | 0.018         | 0.877        |
| GluCer d18:0/18:0 | 0.105          | 0.337        | 0.064         | 0.073        | 0.202         | 0.073        | 0.037         | 0.744        | 0.086         | 0.458        |
| GluCer d18:1/20:0 | <b>.262*</b>   | <b>0.015</b> | <b>0.253</b>  | <b>0.006</b> | <b>0.302</b>  | <b>0.006</b> | 0.164         | 0.150        | 0.169         | 0.141        |
| GluCer d18:0/20:0 | 0.057          | 0.604        | 0.046         | 0.835        | 0.024         | 0.835        | 0.068         | 0.554        | 0.043         | 0.714        |
| GluCer d18:1/22:0 | <b>.233*</b>   | <b>0.031</b> | <b>0.219</b>  | <b>0.001</b> | <b>0.365</b>  | <b>0.001</b> | <b>0.241</b>  | <b>0.032</b> | <b>0.237</b>  | <b>0.038</b> |
| GluCer d18:0/22:0 | 0.145          | 0.182        | 0.107         | 0.143        | 0.165         | 0.143        | 0.101         | 0.375        | 0.072         | 0.535        |
| GluCer d18:1/24:1 | 0.186          | 0.086        | <b>0.153</b>  | <b>0.012</b> | <b>0.280</b>  | <b>0.012</b> | 0.211         | 0.063        | 0.196         | 0.087        |
| GluCer d18:0/24:1 | 0.169          | 0.121        | <b>0.163</b>  | <b>0.006</b> | <b>0.307</b>  | <b>0.006</b> | <b>0.226</b>  | <b>0.045</b> | <b>0.229</b>  | <b>0.045</b> |
| GluCer d18:1/24:0 | 0.195          | 0.071        | <b>0.170</b>  | <b>0.004</b> | <b>0.321</b>  | <b>0.004</b> | <b>0.242</b>  | <b>0.031</b> | <b>0.236</b>  | <b>0.039</b> |
| GluCer d18:0/24:0 | 0.115          | 0.293        | 0.081         | 0.130        | 0.171         | 0.130        | 0.197         | 0.081        | 0.190         | 0.098        |
| LacCer d18:1/16:0 | 0.046          | 0.675        | 0.071         | 0.230        | 0.136         | 0.230        | 0.112         | 0.325        | 0.130         | 0.259        |
| LacCer d18:0/16:0 | -0.012         | 0.909        | 0.001         | 0.731        | -0.039        | 0.731        | 0.013         | 0.909        | 0.025         | 0.829        |
| LacCer d18:1/18:0 | 0.185          | 0.089        | 0.198         | 0.385        | 0.099         | 0.385        | 0.101         | 0.378        | 0.125         | 0.278        |
| LacCer d18:1/20:0 | -0.023         | 0.834        | -0.033        | 0.649        | -0.052        | 0.649        | -0.073        | 0.524        | -0.035        | 0.759        |
| LacCer d18:1/22:0 | 0.143          | 0.190        | 0.163         | 0.110        | 0.180         | 0.110        | 0.141         | 0.215        | 0.163         | 0.156        |
| LacCer d18:1/24:1 | 0.180          | 0.097        | 0.183         | 0.328        | 0.111         | 0.328        | 0.061         | 0.596        | 0.087         | 0.450        |
| LacCer d18:1/24:0 | <b>.239*</b>   | <b>0.027</b> | 0.259         | 0.115        | 0.178         | 0.115        | 0.151         | 0.185        | 0.200         | 0.081        |
| LacCer d18:0/24:1 | 0.094          | 0.387        | 0.129         | 0.283        | 0.121         | 0.283        | -0.015        | 0.896        | -0.021        | 0.855        |
| Gb3 d18:1/16:0    | 0.193          | 0.075        | <b>0.193</b>  | <b>0.036</b> | <b>0.235</b>  | <b>0.036</b> | <b>0.277</b>  | <b>0.013</b> | <b>0.256</b>  | <b>0.025</b> |
| Gb3 d18:1/18:0    | <b>.267*</b>   | <b>0.013</b> | <b>0.288</b>  | <b>0.019</b> | <b>0.261</b>  | <b>0.019</b> | 0.122         | 0.283        | 0.070         | 0.542        |
| Gb3 d18:1/20:0    | 0.164          | 0.131        | 0.164         | 0.358        | 0.104         | 0.358        | 0.045         | 0.695        | 0.051         | 0.657        |
| Gb3 d18:1/22:0    | <b>.285**</b>  | <b>0.008</b> | <b>0.290</b>  | <b>0.045</b> | <b>0.225</b>  | <b>0.045</b> | <b>0.252</b>  | <b>0.025</b> | 0.219         | 0.055        |
| Gb3 d18:1/24:1    | 0.033          | 0.766        | 0.004         | 0.858        | 0.020         | 0.858        | 0.061         | 0.592        | 0.041         | 0.725        |
| Gb3 d18:1/24:0    | <b>.351**</b>  | <b>0.001</b> | <b>0.363</b>  | <b>0.030</b> | <b>0.243</b>  | <b>0.030</b> | <b>0.270</b>  | <b>0.016</b> | <b>0.264</b>  | <b>0.020</b> |
| GM3 d18:1/16:0    | -0.157         | 0.148        | -0.148        | 0.986        | -0.002        | 0.986        | -0.054        | 0.634        | -0.001        | 0.996        |
| GM3 d18:0/16:0    | <b>-.244*</b>  | <b>0.023</b> | -0.209        | 0.580        | -0.063        | 0.580        | -0.076        | 0.507        | -0.022        | 0.849        |
| GM3 d18:1/18:1    | -0.120         | 0.272        | -0.105        | 0.224        | -0.138        | 0.224        | -0.189        | 0.095        | -0.166        | 0.150        |
| GM3 d18:1/18:0    | <b>-.312**</b> | <b>0.003</b> | <b>-0.280</b> | <b>0.027</b> | <b>-0.247</b> | <b>0.027</b> | <b>-0.284</b> | <b>0.011</b> | <b>-0.243</b> | <b>0.033</b> |
| GM3 d18:0/18:0    | <b>-.422**</b> | <b>0.000</b> | <b>-0.397</b> | <b>0.002</b> | <b>-0.345</b> | <b>0.002</b> | <b>-0.344</b> | <b>0.002</b> | <b>-0.290</b> | <b>0.011</b> |
| GM3 d18:1/20:1    | <b>-.247*</b>  | <b>0.022</b> | -0.228        | 0.104        | -0.183        | 0.104        | -0.201        | 0.076        | -0.210        | 0.066        |
| GM3 d18:1/20:0    | <b>-.431**</b> | <b>0.000</b> | <b>-0.393</b> | <b>0.017</b> | <b>-0.266</b> | <b>0.017</b> | <b>-0.295</b> | <b>0.008</b> | <b>-0.235</b> | <b>0.039</b> |
| GM3 d18:0/20:0    | <b>-.507**</b> | <b>0.000</b> | <b>-0.490</b> | <b>0.000</b> | <b>-0.383</b> | <b>0.000</b> | <b>-0.350</b> | <b>0.002</b> | <b>-0.306</b> | <b>0.007</b> |
| GM3 d18:1/22:1    | <b>-.280**</b> | <b>0.009</b> | -0.261        | 0.334        | -0.109        | 0.334        | -0.117        | 0.304        | -0.064        | 0.579        |
| GM3 d18:1/22:0    | <b>-.347**</b> | <b>0.001</b> | -0.316        | 0.369        | -0.102        | 0.369        | -0.132        | 0.246        | -0.070        | 0.546        |
| GM3 d18:0/22:0    | <b>-.471**</b> | <b>0.000</b> | -0.446        | 0.072        | -0.203        | 0.072        | <b>-0.235</b> | <b>0.037</b> | -0.172        | 0.135        |
| GM3 d18:1/24:1    | -0.180         | 0.097        | -0.150        | 0.542        | -0.069        | 0.542        | -0.199        | 0.079        | -0.140        | 0.223        |
| GM3 d18:1/24:0    | -0.147         | 0.178        | -0.106        | 0.942        | -0.008        | 0.942        | -0.118        | 0.299        | -0.049        | 0.670        |
| GM3 d18:0/24:0    | <b>-.400**</b> | <b>0.000</b> | -0.377        | 0.111        | -0.179        | 0.111        | -0.165        | 0.146        | -0.115        | 0.317        |
| FFA               | <b>-.350**</b> | <b>0.001</b> | -0.316        | 0.284        | -0.121        | 0.284        | 0.021         | 0.855        | -0.015        | 0.894        |
| SM                | <b>.467**</b>  | <b>0.000</b> | <b>0.449</b>  | <b>0.000</b> | <b>0.425</b>  | <b>0.000</b> | <b>0.324</b>  | <b>0.004</b> | <b>0.328</b>  | <b>0.004</b> |
| Cer               | <b>-.227*</b>  | <b>0.036</b> | -0.205        | 0.786        | -0.031        | 0.786        | 0.039         | 0.735        | 0.035         | 0.765        |
| GluCer            | 0.173          | 0.111        | <b>0.153</b>  | <b>0.006</b> | <b>0.304</b>  | <b>0.006</b> | 0.213         | 0.060        | 0.214         | 0.061        |
| LacCer            | 0.099          | 0.362        | 0.122         | 0.201        | 0.144         | 0.201        | 0.114         | 0.316        | 0.139         | 0.228        |
| GM3               | <b>-.301**</b> | <b>0.005</b> | -0.270        | 0.252        | -0.130        | 0.252        | -0.200        | 0.078        | -0.134        | 0.247        |
| Gb3               | <b>.245*</b>   | <b>0.023</b> | <b>0.248</b>  | <b>0.016</b> | <b>0.268</b>  | <b>0.016</b> | <b>0.287</b>  | <b>0.010</b> | <b>0.260</b>  | <b>0.022</b> |
| SM/Cer            | <b>.498**</b>  | <b>0.000</b> | <b>0.478</b>  | <b>0.000</b> | <b>0.434</b>  | <b>0.000</b> | <b>0.318</b>  | <b>0.004</b> | <b>0.321</b>  | <b>0.004</b> |

734

735

736

737 Supplementary Table 7 ROC curve for insulin sensitivity.

| lipid          | FPIR           |              | FPIR(age, sex) |              | FPIR(age,sex,LDLc,HDLc,TC,TG) |              | FPIR(age,sex,LDLc,HDLc,TC,TG,BMI) |              | FPIR(age,sex,LDLc,HDLc,TC,TG,BMI,AS T,ALT) |              |
|----------------|----------------|--------------|----------------|--------------|-------------------------------|--------------|-----------------------------------|--------------|--------------------------------------------|--------------|
|                | r              | p            | adjusted r     | p            | adjusted r                    | p            | adjusted r                        | p            | adjusted r                                 | p            |
| FFA22:6        | <b>-.216*</b>  | <b>0.046</b> | -0.180         | 0.131        | -0.170                        | 0.131        | -0.176                            | 0.12         | -0.196                                     | 0.088        |
| FFA22:5        | <b>-.300**</b> | <b>0.005</b> | <b>-0.233</b>  | <b>0.032</b> | <b>-0.240</b>                 | <b>0.032</b> | <b>-0.239</b>                     | <b>0.034</b> | <b>-0.266</b>                              | <b>0.019</b> |
| FFA22:4        | -0.199         | 0.067        | -0.164         | 0.096        | -0.187                        | 0.096        | -0.172                            | 0.129        | -0.218                                     | 0.057        |
| FFA20:5        | -0.158         | 0.146        | -0.196         | 0.088        | -0.192                        | 0.088        | -0.18                             | 0.113        | -0.217                                     | 0.058        |
| FFA20:4        | -0.164         | 0.132        | -0.180         | 0.119        | -0.176                        | 0.119        | -0.179                            | 0.115        | <b>-0.231</b>                              | <b>0.043</b> |
| FFA20:3        | -0.195         | 0.072        | -0.162         | 0.147        | -0.164                        | 0.147        | -0.156                            | 0.169        | -0.192                                     | 0.094        |
| FFA18:3        | -0.062         | 0.571        | 0.001          | 0.987        | 0.002                         | 0.987        | 0.017                             | 0.881        | 0.004                                      | 0.973        |
| FFA18:2        | <b>-.295**</b> | <b>0.006</b> | <b>-0.235</b>  | <b>0.037</b> | <b>-0.234</b>                 | <b>0.037</b> | <b>-0.224</b>                     | <b>0.047</b> | <b>-0.259</b>                              | <b>0.023</b> |
| FFA18:1        | <b>-.314**</b> | <b>0.003</b> | <b>-0.248</b>  | <b>0.014</b> | <b>-0.273</b>                 | <b>0.014</b> | <b>-0.26</b>                      | <b>0.021</b> | <b>-0.272</b>                              | <b>0.017</b> |
| FFA18:0        | -0.197         | 0.069        | -0.143         | 0.101        | -0.185                        | 0.101        | -0.163                            | 0.15         | -0.173                                     | 0.132        |
| FFA16:1        | 0.034          | 0.758        | 0.066          | 0.568        | 0.065                         | 0.568        | 0.116                             | 0.31         | 0.103                                      | 0.372        |
| FFA16:0        | <b>-.306**</b> | <b>0.004</b> | <b>-0.278</b>  | <b>0.007</b> | <b>-0.302</b>                 | <b>0.007</b> | <b>-0.29</b>                      | <b>0.009</b> | <b>-0.322</b>                              | <b>0.004</b> |
| FFA14:0        | -0.056         | 0.607        | -0.027         | 0.736        | -0.038                        | 0.736        | -0.024                            | 0.837        | -0.054                                     | 0.64         |
| FA13:0         | -0.03          | 0.781        | -0.013         | 0.903        | -0.014                        | 0.903        | -0.022                            | 0.847        | -0.043                                     | 0.711        |
| FA12:0         | 0.022          | 0.843        | 0.026          | 0.800        | 0.029                         | 0.800        | 0.016                             | 0.886        | -0.013                                     | 0.913        |
| SM d18:1/16:1  | -0.037         | 0.734        | -0.075         | 0.591        | -0.061                        | 0.591        | -0.094                            | 0.41         | -0.099                                     | 0.391        |
| SM d18:1/16:0  | -0.028         | 0.8          | -0.065         | 0.643        | -0.053                        | 0.643        | -0.089                            | 0.435        | -0.094                                     | 0.415        |
| SM d18:0/16:0  | -0.026         | 0.814        | -0.062         | 0.652        | -0.051                        | 0.652        | -0.086                            | 0.451        | -0.091                                     | 0.433        |
| SM d18:1/17:1  | -0.029         | 0.792        | -0.062         | 0.680        | -0.047                        | 0.680        | -0.084                            | 0.463        | -0.089                                     | 0.443        |
| SM d18:1/17:0  | -0.029         | 0.79         | -0.063         | 0.668        | -0.049                        | 0.668        | -0.087                            | 0.446        | -0.091                                     | 0.431        |
| SM d18:1/18:1  | -0.035         | 0.747        | -0.068         | 0.634        | -0.054                        | 0.634        | -0.09                             | 0.431        | -0.093                                     | 0.423        |
| SM d18:1/18:0  | -0.034         | 0.755        | -0.067         | 0.633        | -0.054                        | 0.633        | -0.089                            | 0.435        | -0.091                                     | 0.434        |
| SM d18:0/18:0  | -0.043         | 0.695        | -0.076         | 0.546        | -0.068                        | 0.546        | -0.097                            | 0.394        | -0.093                                     | 0.423        |
| SM d18:1/19:1  | -0.022         | 0.838        | -0.058         | 0.707        | -0.043                        | 0.707        | -0.081                            | 0.479        | -0.087                                     | 0.452        |
| SM d18:1/19:0  | -0.028         | 0.796        | -0.055         | 0.724        | -0.040                        | 0.724        | -0.077                            | 0.502        | -0.078                                     | 0.503        |
| SM d18:1/20:1  | -0.021         | 0.847        | -0.056         | 0.718        | -0.041                        | 0.718        | -0.078                            | 0.494        | -0.083                                     | 0.472        |
| SM d18:1/20:0  | -0.015         | 0.89         | -0.045         | 0.790        | -0.030                        | 0.790        | -0.065                            | 0.569        | -0.067                                     | 0.562        |
| SM d18:1/21:1  | -0.017         | 0.88         | -0.049         | 0.776        | -0.032                        | 0.776        | -0.07                             | 0.542        | -0.077                                     | 0.507        |
| SM d18:1/21:0  | -0.01          | 0.93         | -0.038         | 0.852        | -0.021                        | 0.852        | -0.055                            | 0.628        | -0.056                                     | 0.626        |
| SM d18:1/22:1  | -0.01          | 0.93         | -0.045         | 0.792        | -0.030                        | 0.792        | -0.065                            | 0.57         | -0.069                                     | 0.549        |
| SM d18:1/22:0  | -0.012         | 0.912        | -0.049         | 0.759        | -0.035                        | 0.759        | -0.069                            | 0.546        | -0.074                                     | 0.523        |
| SM d18:1/23:1  | -0.019         | 0.863        | -0.054         | 0.737        | -0.038                        | 0.737        | -0.076                            | 0.504        | -0.083                                     | 0.475        |
| SM d18:1/23:0  | -0.024         | 0.828        | -0.058         | 0.708        | -0.043                        | 0.708        | -0.079                            | 0.489        | -0.084                                     | 0.466        |
| SM d18:1/24:1  | -0.024         | 0.823        | -0.058         | 0.692        | -0.045                        | 0.692        | -0.081                            | 0.475        | -0.092                                     | 0.428        |
| SM d18:1/24:0  | -0.016         | 0.882        | -0.053         | 0.727        | -0.040                        | 0.727        | -0.074                            | 0.518        | -0.079                                     | 0.497        |
| SM d18:0/24:0  | -0.016         | 0.883        | -0.053         | 0.724        | -0.040                        | 0.724        | -0.073                            | 0.52         | -0.077                                     | 0.506        |
| SM d18:1/25:1  | -0.026         | 0.811        | -0.056         | 0.721        | -0.041                        | 0.721        | -0.078                            | 0.495        | -0.08                                      | 0.488        |
| SM d18:1/25:0  | -0.024         | 0.824        | -0.059         | 0.695        | -0.045                        | 0.695        | -0.082                            | 0.471        | -0.086                                     | 0.455        |
| SM d18:0/25:0  | -0.027         | 0.806        | -0.065         | 0.652        | -0.051                        | 0.652        | -0.091                            | 0.425        | -0.101                                     | 0.384        |
| SM d18:1/26:1  | -0.033         | 0.764        | -0.064         | 0.647        | -0.052                        | 0.647        | -0.09                             | 0.431        | -0.102                                     | 0.378        |
| SM d18:1/26:0  | -0.044         | 0.69         | -0.094         | 0.457        | -0.084                        | 0.457        | -0.123                            | 0.28         | -0.14                                      | 0.224        |
| SM d18:0/26:0  | -0.039         | 0.72         | -0.088         | 0.507        | -0.075                        | 0.507        | -0.12                             | 0.291        | -0.135                                     | 0.24         |
| Cer d18:1/16:0 | -0.171         | 0.114        | -0.185         | 0.112        | -0.179                        | 0.112        | -0.179                            | 0.114        | -0.194                                     | 0.09         |
| Cer d18:1/18:0 | 0.047          | 0.668        | -0.004         | 0.973        | 0.004                         | 0.973        | 0.035                             | 0.758        | 0.004                                      | 0.969        |
| Cer d18:0/18:0 | 0.039          | 0.719        | 0.026          | 0.710        | 0.042                         | 0.710        | 0.04                              | 0.729        | 0.046                                      | 0.689        |
| Cer d18:1/20:0 | -0.023         | 0.837        | -0.048         | 0.740        | -0.038                        | 0.740        | -0.012                            | 0.919        | -0.022                                     | 0.851        |
| Cer d18:1/22:0 | -0.071         | 0.513        | -0.049         | 0.755        | -0.035                        | 0.755        | -0.04                             | 0.727        | -0.022                                     | 0.849        |
| Cer d18:1/24:1 | <b>-0.213*</b> | <b>0.049</b> | -0.180         | 0.067        | -0.206                        | 0.067        | -0.19                             | 0.093        | -0.207                                     | 0.07         |
| Cer d18:1/24:0 | -0.109         | 0.32         | -0.045         | 0.757        | -0.035                        | 0.757        | -0.046                            | 0.688        | -0.022                                     | 0.851        |
| Cer d18:0/24:1 | 0.024          | 0.829        | 0.037          | 0.637        | 0.053                         | 0.637        | 0.062                             | 0.588        | 0.042                                      | 0.715        |

738

|                   |                |              |               |              |               |              |               |              |               |              |
|-------------------|----------------|--------------|---------------|--------------|---------------|--------------|---------------|--------------|---------------|--------------|
| GluCer d18:1/16:0 | <b>-0.225*</b> | <b>0.038</b> | <b>-0.284</b> | <b>0.001</b> | <b>-0.350</b> | <b>0.001</b> | <b>-0.369</b> | <b>0.001</b> | <b>-0.372</b> | <b>0.001</b> |
| GluCer d18:0/16:0 | -0.092         | 0.397        | -0.130        | 0.144        | -0.165        | 0.144        | -0.167        | 0.141        | -0.179        | 0.118        |
| GluCer d18:1/18:0 | <b>-0.236*</b> | <b>0.029</b> | <b>-0.232</b> | <b>0.013</b> | <b>-0.276</b> | <b>0.013</b> | <b>-0.313</b> | <b>0.005</b> | <b>-0.314</b> | <b>0.005</b> |
| GluCer d18:0/18:0 | 0.052          | 0.637        | 0.012         | 0.851        | 0.021         | 0.851        | -0.009        | 0.94         | 0.043         | 0.711        |
| GluCer d18:1/20:0 | <b>-0.255*</b> | <b>0.018</b> | <b>-0.278</b> | <b>0.007</b> | <b>-0.302</b> | <b>0.007</b> | <b>-0.349</b> | <b>0.002</b> | <b>-0.376</b> | <b>0.001</b> |
| GluCer d18:0/20:0 | -0.003         | 0.979        | -0.038        | 0.726        | -0.040        | 0.726        | -0.035        | 0.758        | -0.068        | 0.558        |
| GluCer d18:1/22:0 | -0.152         | 0.163        | <b>-0.202</b> | <b>0.035</b> | <b>-0.236</b> | <b>0.035</b> | <b>-0.282</b> | <b>0.012</b> | <b>-0.309</b> | <b>0.006</b> |
| GluCer d18:0/22:0 | -0.001         | 0.996        | -0.061        | 0.487        | -0.079        | 0.487        | -0.095        | 0.403        | -0.142        | 0.217        |
| GluCer d18:1/24:1 | -0.157         | 0.149        | <b>-0.218</b> | <b>0.024</b> | <b>-0.253</b> | <b>0.024</b> | <b>-0.28</b>  | <b>0.012</b> | <b>-0.325</b> | <b>0.004</b> |
| GluCer d18:0/24:1 | -0.137         | 0.208        | <b>-0.181</b> | <b>0.046</b> | <b>-0.223</b> | <b>0.046</b> | <b>-0.254</b> | <b>0.024</b> | <b>-0.271</b> | <b>0.017</b> |
| GluCer d18:1/24:0 | -0.114         | 0.295        | -0.174        | 0.072        | -0.202        | 0.072        | <b>-0.233</b> | <b>0.039</b> | <b>-0.258</b> | <b>0.023</b> |
| GluCer d18:0/24:0 | -0.111         | 0.307        | <b>-0.207</b> | <b>0.027</b> | <b>-0.247</b> | <b>0.027</b> | <b>-0.252</b> | <b>0.025</b> | <b>-0.296</b> | <b>0.009</b> |
| LacCer d18:1/16:0 | -0.172         | 0.113        | -0.158        | 0.119        | -0.176        | 0.119        | -0.186        | 0.101        | -0.172        | 0.136        |
| LacCer d18:0/16:0 | -0.074         | 0.498        | -0.068        | 0.496        | -0.077        | 0.496        | -0.07         | 0.543        | -0.052        | 0.656        |
| LacCer d18:1/18:0 | -0.128         | 0.242        | -0.122        | 0.293        | -0.119        | 0.293        | -0.124        | 0.278        | -0.103        | 0.375        |
| LacCer d18:1/20:0 | <b>-0.256*</b> | <b>0.018</b> | <b>-0.278</b> | <b>0.013</b> | <b>-0.277</b> | <b>0.013</b> | <b>-0.279</b> | <b>0.013</b> | <b>-0.246</b> | <b>0.031</b> |
| LacCer d18:1/22:0 | -0.207         | 0.056        | -0.200        | 0.078        | -0.198        | 0.078        | -0.213        | 0.06         | -0.2          | 0.081        |
| LacCer d18:1/24:1 | <b>-0.234*</b> | <b>0.03</b>  | <b>-0.265</b> | <b>0.013</b> | <b>-0.277</b> | <b>0.013</b> | <b>-0.291</b> | <b>0.009</b> | <b>-0.277</b> | <b>0.015</b> |
| LacCer d18:1/24:0 | <b>-0.240*</b> | <b>0.026</b> | <b>-0.232</b> | <b>0.030</b> | <b>-0.243</b> | <b>0.030</b> | <b>-0.256</b> | <b>0.023</b> | -0.224        | 0.05         |
| LacCer d18:0/24:1 | -0.112         | 0.306        | -0.112        | 0.310        | -0.115        | 0.310        | -0.141        | 0.214        | -0.143        | 0.215        |
| Gb3 d18:1/16:0    | -0.194         | 0.073        | <b>-0.204</b> | <b>0.041</b> | <b>-0.229</b> | <b>0.041</b> | <b>-0.234</b> | <b>0.038</b> | <b>-0.277</b> | <b>0.015</b> |
| Gb3 d18:1/18:0    | -0.134         | 0.22         | -0.107        | 0.397        | -0.096        | 0.397        | -0.131        | 0.251        | -0.197        | 0.086        |
| Gb3 d18:1/20:0    | -0.068         | 0.532        | -0.039        | 0.808        | -0.028        | 0.808        | -0.04         | 0.726        | -0.048        | 0.682        |
| Gb3 d18:1/22:0    | -0.045         | 0.68         | -0.028        | 0.947        | -0.008        | 0.947        | -0.013        | 0.909        | -0.063        | 0.585        |
| Gb3 d18:1/24:1    | 0.051          | 0.643        | -0.009        | 0.960        | -0.006        | 0.960        | -0.001        | 0.992        | -0.024        | 0.838        |
| Gb3 d18:1/24:0    | -0.057         | 0.605        | -0.071        | 0.534        | -0.071        | 0.534        | -0.077        | 0.498        | -0.092        | 0.425        |
| GM3 d18:1/16:0    | -0.183         | 0.091        | <b>-0.186</b> | <b>0.036</b> | <b>-0.235</b> | <b>0.036</b> | <b>-0.244</b> | <b>0.03</b>  | -0.201        | 0.079        |
| GM3 d18:0/16:0    | -0.198         | 0.068        | -0.158        | 0.092        | -0.190        | 0.092        | -0.19         | 0.093        | -0.145        | 0.207        |
| GM3 d18:1/18:1    | -0.126         | 0.249        | -0.129        | 0.289        | -0.120        | 0.289        | -0.122        | 0.284        | -0.108        | 0.348        |
| GM3 d18:1/18:0    | -0.094         | 0.389        | -0.080        | 0.434        | -0.089        | 0.434        | -0.084        | 0.46         | -0.043        | 0.713        |
| GM3 d18:0/18:0    | -0.088         | 0.421        | -0.060        | 0.516        | -0.074        | 0.516        | -0.06         | 0.597        | 0.015         | 0.895        |
| GM3 d18:1/20:1    | -0.114         | 0.297        | -0.086        | 0.502        | -0.076        | 0.502        | -0.072        | 0.53         | -0.078        | 0.498        |
| GM3 d18:1/20:0    | -0.109         | 0.318        | -0.051        | 0.630        | -0.055        | 0.630        | -0.048        | 0.672        | 0.029         | 0.805        |
| GM3 d18:0/20:0    | -0.073         | 0.503        | -0.046        | 0.739        | -0.038        | 0.739        | -0.018        | 0.874        | 0.057         | 0.623        |
| GM3 d18:1/22:1    | -0.209         | 0.054        | -0.195        | 0.064        | -0.208        | 0.064        | -0.206        | 0.069        | -0.166        | 0.149        |
| GM3 d18:1/22:0    | -0.107         | 0.327        | -0.072        | 0.441        | -0.087        | 0.441        | -0.088        | 0.442        | -0.022        | 0.848        |
| GM3 d18:0/22:0    | -0.066         | 0.547        | -0.025        | 0.698        | -0.044        | 0.698        | -0.041        | 0.722        | 0.036         | 0.755        |
| GM3 d18:1/24:1    | -0.121         | 0.266        | -0.095        | 0.347        | -0.107        | 0.347        | -0.122        | 0.283        | -0.077        | 0.508        |
| GM3 d18:1/24:0    | -0.104         | 0.34         | -0.086        | 0.428        | -0.090        | 0.428        | -0.105        | 0.356        | -0.04         | 0.728        |
| GM3 d18:0/24:0    | -0.188         | 0.083        | -0.148        | 0.099        | -0.186        | 0.099        | -0.178        | 0.116        | -0.118        | 0.307        |
| FFA               | <b>-0.231*</b> | <b>0.032</b> | -0.173        | 0.094        | -0.189        | 0.094        | -0.17         | 0.133        | -0.21         | 0.066        |
| SM                | -0.024         | 0.826        | -0.060        | 0.683        | -0.046        | 0.683        | -0.082        | 0.471        | -0.088        | 0.449        |
| Cer               | -0.152         | 0.161        | -0.117        | 0.264        | -0.126        | 0.264        | -0.117        | 0.303        | -0.118        | 0.306        |
| GluCer            | -0.177         | 0.102        | <b>-0.231</b> | <b>0.012</b> | <b>-0.281</b> | <b>0.012</b> | <b>-0.316</b> | <b>0.005</b> | <b>-0.34</b>  | <b>0.002</b> |
| LacCer            | -0.205         | 0.058        | -0.199        | 0.054        | -0.217        | 0.054        | <b>-0.229</b> | <b>0.043</b> | -0.211        | 0.066        |
| GM3               | -0.154         | 0.157        | -0.130        | 0.162        | -0.158        | 0.162        | -0.163        | 0.151        | -0.101        | 0.381        |
| Gb3               | -0.168         | 0.121        | -0.171        | 0.087        | -0.193        | 0.087        | -0.203        | 0.073        | <b>-0.255</b> | <b>0.025</b> |
| SM/Cer            | -0.004         | 0.972        | -0.044        | 0.775        | -0.032        | 0.775        | -0.071        | 0.535        | -0.078        | 0.501        |

739

740

741

742
